# Supplementary material for: Data-driven discovery of electrocatalysts for CO2 reduction using active motifs-based machine learning
Source: Springer Nature journal article supplement (doi:10.1038/s41467-023-43118-0), 2023-11-11
Supplement: 41467_2023_43118_MOESM1_ESM.pdf [file 41467_2023_43118_MOESM1_ESM.pdf]

# Supplementary Information for

## “Data-driven Discovery of Electrocatalysts for CO<sub>2</sub> Reduction using Active Motifs-based Machine Learning”

*Dong Hyeon Mok<sup>1,#</sup>, Hong Li<sup>2,#</sup>, Guiru Zhang<sup>2</sup>, Chaehyeon Lee<sup>1</sup>, Kun Jiang<sup>2,\*</sup> and Seoin Back<sup>1,\*</sup>*

<sup>1</sup>Department of Chemical and Biomolecular Engineering, Institute of Emergent Materials, Sogang University, Seoul 04107, Republic of Korea

<sup>2</sup>Interdisciplinary Research Center, School of Mechanical Engineering, Shanghai Jiao Tong University, Shanghai 200240, China.

<sup>#</sup>These authors contributed equally to this work.

### **Corresponding Authors**

E-mail: seoin0226@gmail.com (S. B.), kunjiang@sjtu.edu.cn (K. J.)

## Supplementary Note 1: DSTAR-based High-throughput Virtual Screening Pipeline

As shown in **Figure S1**, DSTAR-based high-throughput screening begins by (i) converting all surfaces in the dataset into active motif-based representations, which are then used as fingerprints to train regression models. The representation includes positional information of the active motif, which is divided into three sites: the first nearest neighbor (FNN) atoms of the adsorbates, the second nearest neighbor atoms in the surface layer ( $\text{SNN}_{\text{same}}$ ), and the sublayer ( $\text{SNN}_{\text{sub}}$ ). Then, it incorporates their weighted average elemental properties (Atomic number, Block, Ionic radius, Oxidation state, Electronegativity, Row, Group, Thermal conductivity, Boiling point, Melting point, First ionization energy) and the number of atoms of each site. (ii) The regression model is trained using the active motif representations and their corresponding binding energy. (iii) All active motif representations are converted into prototypes of active motifs that only contains positional information without any elemental details. This is to remove duplicates and collect unique active motifs. (iv) To expand the chemical space, new elemental combinations that are outside the original domain are inserted into the prototype of unique active motifs, resulting in a new set of active motif representations. The number of active motifs generated per elemental combination is the same as the number of prototypes of unique active motifs. (v) The trained regression model predicts the binding energies of the new set of active motifs. The predicted binding energies are plotted on a 3D selectivity map to calculate the product selectivity of a specific elemental combination.

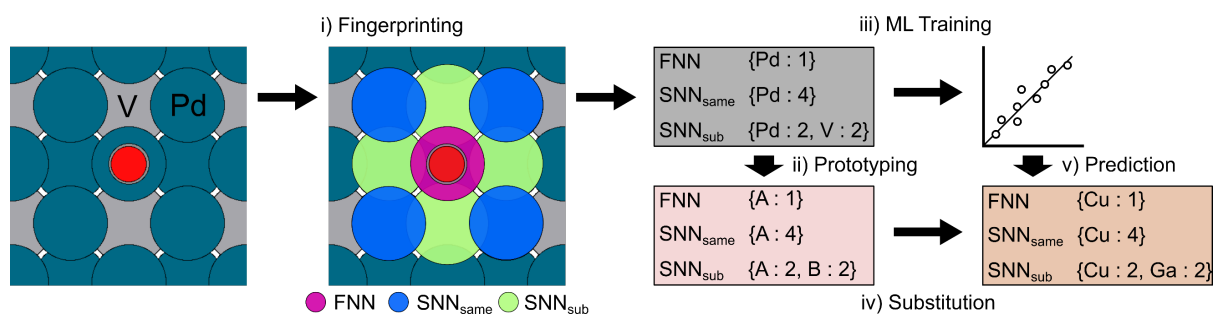

**Figure S1.** Schematics of high-throughput virtual screening using DSTAR.

## Supplementary Note 2: Reaction Mechanism of CO<sub>2</sub>RR

The initial protonation step of CO<sub>2</sub> reduction can proceed through two pathways; formation of an O-H bond to produce COOH\* (reaction (i)) and formation of a C-H bond to produce HCOO\* species (reaction (ii)).

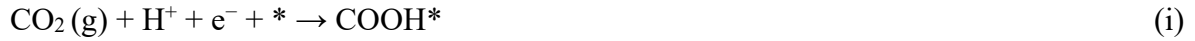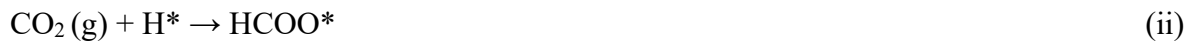

Reaction (i) results in the production of CO\*/CO (g), which is a key intermediate that can be further reduced to produce C<sub>1</sub> or C<sub>2+</sub> products, while reaction (ii) typically leads to the production of HCOOH production. We note that reaction (ii) is a chemical step which requires a prior surface protonation step (reaction (iii)), so-called the Volmer step.

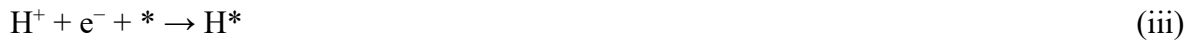

We will also consider the possibility of surface poisoning by OH\* when the binding energy of OH\* is strong enough to inhibit its protonation to water (reaction (iv)).

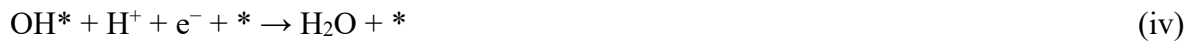

The boundary conditions for the competition between HCOO\* vs COOH\* pathways, as well as the two additional reactions that determine surface adsorption states, can be expressed by following equations:

$$\Delta G_{rxn}^{(i)} = \Delta G_{rxn}^{(ii)} \quad (1)$$

$$\Delta G_{rxn}^{(iii)} = 0 \text{ eV} \quad (2)$$

$$\Delta G_{rxn}^{(iv)} = 0 \text{ eV} \quad (3)$$

After the production of CO\* following the COOH\* pathway, protonation of CO\* can proceed to two possible intermediates, either CHO\* or COH\*. In this study, we referred to the results of energetic and kinetic investigations on both CO\* protonation pathways performed by



Tang et al.<sup>1</sup> These investigations suggested that the COH\* pathway (reaction (v)) is more energetically accessible than the CHO\* pathway due to the kinetically locked nature of the CHO\* pathway at the negative potential. As the direct protonation of CO\* to CHO\* ( $\text{CO}^* + \text{H}^+ + \text{e}^- \rightarrow \text{CHO}^*$ ) is significantly sluggish compared to COH\* formation, CHO\* formation primarily relies on the thermal coupling of CO\* and adsorbed H\* ( $\text{CO}^* + \text{H}^* \rightarrow \text{COH}^*$ ), requiring the preceding Volmer reaction ( $\text{H}^+ + \text{e}^- + * \rightarrow \text{H}^*$ ). However, the coupling barrier of CO\* and H\* remains independent of the applied potential, rendering the COH\* pathway more favorable at the operating potential regions. Consequently, in this study, we will exclusively focus on the COH\* pathway for the generation of C<sub>1+</sub> products.

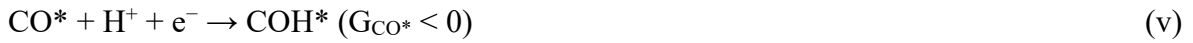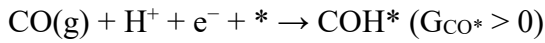

For the further reduction of COH\* toward C<sub>1+</sub> products, the protonation of CO\* to form COH\* is known to be the rate-determining step<sup>2</sup>. Thus, we used the reaction Gibbs energy of CO\* protonation as a boundary condition to determine its further protonation. The criterion was set as follows.

$$\Delta G_{rxn}^{(v)} = 0.75 \text{ eV} \quad (4)$$

The reaction Gibbs energy was used as the criterion instead of the activation energy, since the former was found to be slightly lower than the latter for Cu (100), and much more efficient to calculate.<sup>1</sup>

To establish boundary conditions for CO<sub>2</sub>RR against hydrogen evolution reaction (HER), we refer to the theoretical results by Tang et al. regarding CH<sub>x</sub>\* formation. It was suggested that the protonation of CH\* to CH<sub>2</sub>\* is the most unfavorable step after the electroreduction of CO\* to C\*. The competition between  $\text{CH}^* + \text{H}^+ + \text{e}^- \rightarrow \text{CH}_2^*$  vs.  $* + \text{H}^+ + \text{e}^- \rightarrow \text{H}^*$  is identical to the potential independent condition as follows:

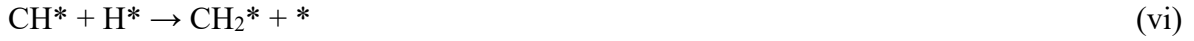

Further protonation of  $\text{H}^*$ , also known as Heyrovsky reaction, produces  $\text{H}_2$ , (reaction (vii)).

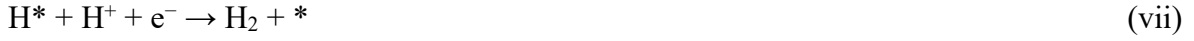

Thus, two boundary conditions for determining HER selective region are

$$\Delta G_{rxn}^{(vi)} = 0 \text{ eV}$$
 (5)

$$\Delta G_{rxn}^{(vii)} = 0 \text{ eV}$$
 (6)

The thermodynamic boundary conditions are represented by three binding energy descriptors ( $\Delta E_{\text{CO}^*}$ ,  $\Delta E_{\text{H}^*}$  and  $\Delta E_{\text{OH}^*}$ ) using linear scaling relationships between these descriptors and other intermediates of  $\text{CO}_2\text{RR}$ . We note that the applied potential term,  $eU$ , in boundary conditions demonstrates its potential-dependency. The details of the scaling lines, free energy diagram, boundary conditions represented by energetic descriptors and applied potential are enumerated **Figure S3**, **Figure S4** and **Table S3**, respectively.

|          |          |                 |           |           |           |           |           |           |           |           |           |           |           |           |           |           |           |
|----------|----------|-----------------|-----------|-----------|-----------|-----------|-----------|-----------|-----------|-----------|-----------|-----------|-----------|-----------|-----------|-----------|-----------|
| 1<br>H   |          |                 |           |           |           |           |           |           |           |           |           |           |           |           |           |           | 2<br>He   |
| 3<br>Li  | 4<br>Be  |                 |           |           |           |           |           |           |           |           |           | 5<br>B    | 6<br>C    | 7<br>N    | 8<br>O    | 9<br>F    | 10<br>Ne  |
| 11<br>Na | 12<br>Mg |                 |           |           |           |           |           |           |           |           |           | 13<br>Al  | 14<br>Si  | 15<br>P   | 16<br>S   | 17<br>Cl  | 18<br>Ar  |
| 19<br>K  | 20<br>Ca | 21<br>Sc        | 22<br>Ti  | 23<br>V   | 24<br>Cr  | 25<br>Mn  | 26<br>Fe  | 27<br>Co  | 28<br>Ni  | 29<br>Cu  | 30<br>Zn  | 31<br>Ga  | 32<br>Ge  | 33<br>As  | 34<br>Se  | 35<br>Br  | 36<br>Kr  |
| 37<br>Rb | 38<br>Sr | 39<br>Y         | 40<br>Zr  | 41<br>Nb  | 42<br>Mo  | 43<br>Tc  | 44<br>Ru  | 45<br>Rh  | 46<br>Pd  | 47<br>Ag  | 48<br>Cd  | 49<br>In  | 50<br>Sn  | 51<br>Sb  | 52<br>Te  | 53<br>I   | 54<br>Xe  |
| 55<br>Cs | 56<br>Ba | 57-71<br>Lant.  | 72<br>Hf  | 73<br>Ta  | 74<br>W   | 75<br>Re  | 76<br>Os  | 77<br>Ir  | 78<br>Pt  | 79<br>Au  | 80<br>Hg  | 81<br>Tl  | 82<br>Pb  | 83<br>Bi  | 84<br>Po  | 85<br>At  | 86<br>Rn  |
| 87<br>Fr | 88<br>Ra | 89-103<br>Acti. | 104<br>Rf | 105<br>Db | 106<br>Sg | 107<br>Bh | 108<br>Hs | 109<br>Mt | 110<br>Ds | 111<br>Rg | 112<br>Cn | 113<br>Nh | 114<br>Fl | 115<br>Mc | 116<br>Lv | 117<br>Ts | 118<br>Og |

**Figure S2.** Periodic table highlighting the elements used in this work.

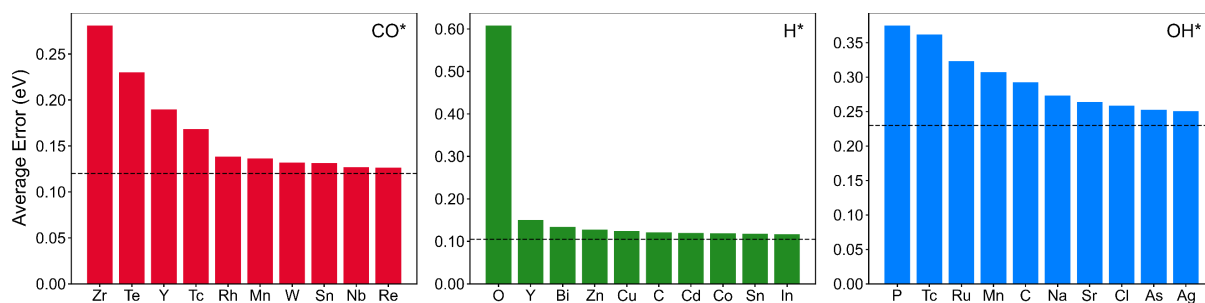

**Figure S3.** Average binding energy prediction error of CO\* (Red), H\* (Green) and OH\* (Blue) when specific elements are included in local surface. Dashed line indicates MAE of ML for each adsorbate. A large error means that the model is likely to incorrectly predict the binding energy of surface containing the corresponding element.

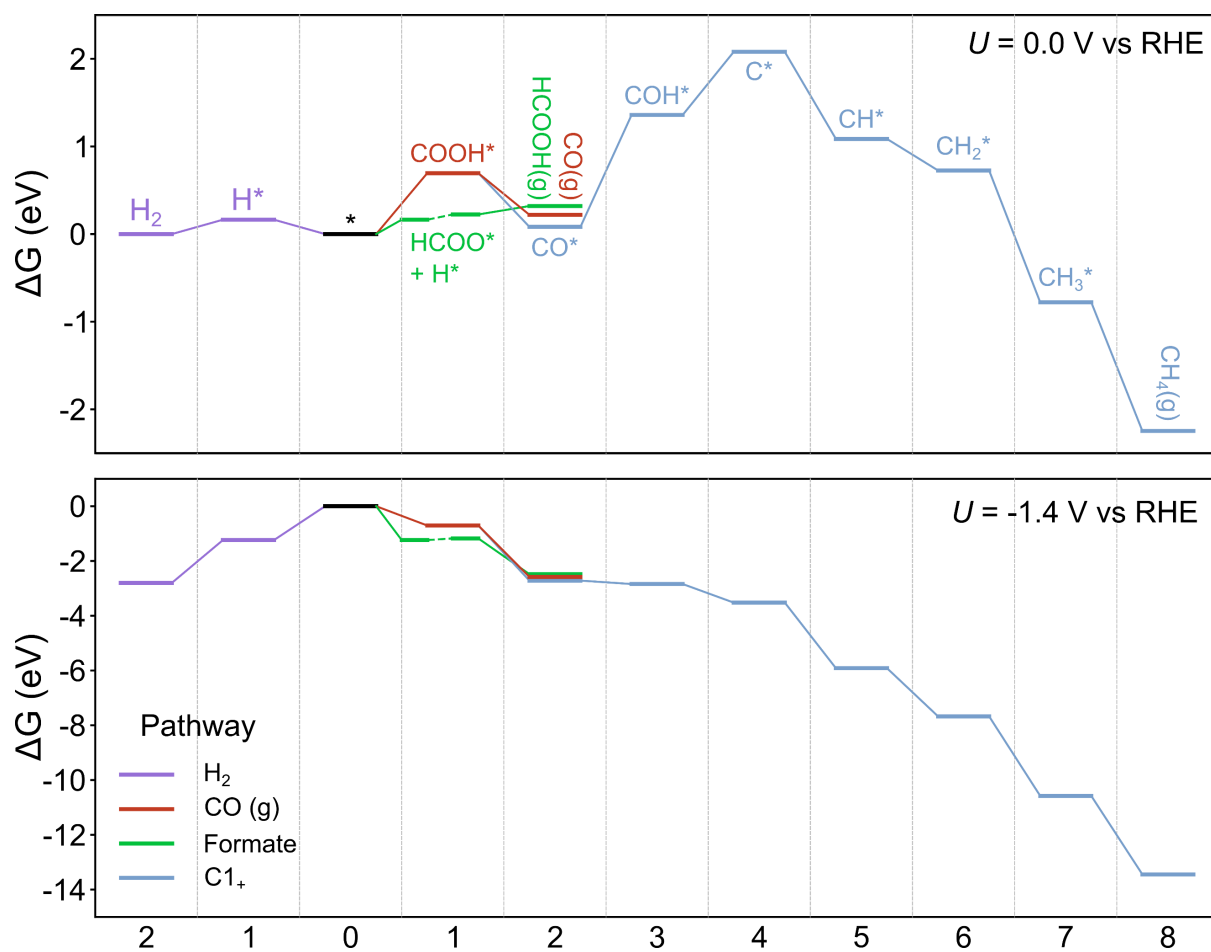

**Figure S4.** The Gibbs free energy diagram of CO<sub>2</sub>RR on Cu (111) at  $U = 0.0$  V and  $-1.4$  V vs. RHE. The pathways for four products are shown: H<sub>2</sub> (Purple), HCOOH (Green), CO (Red) and CH<sub>4</sub> (Blue)

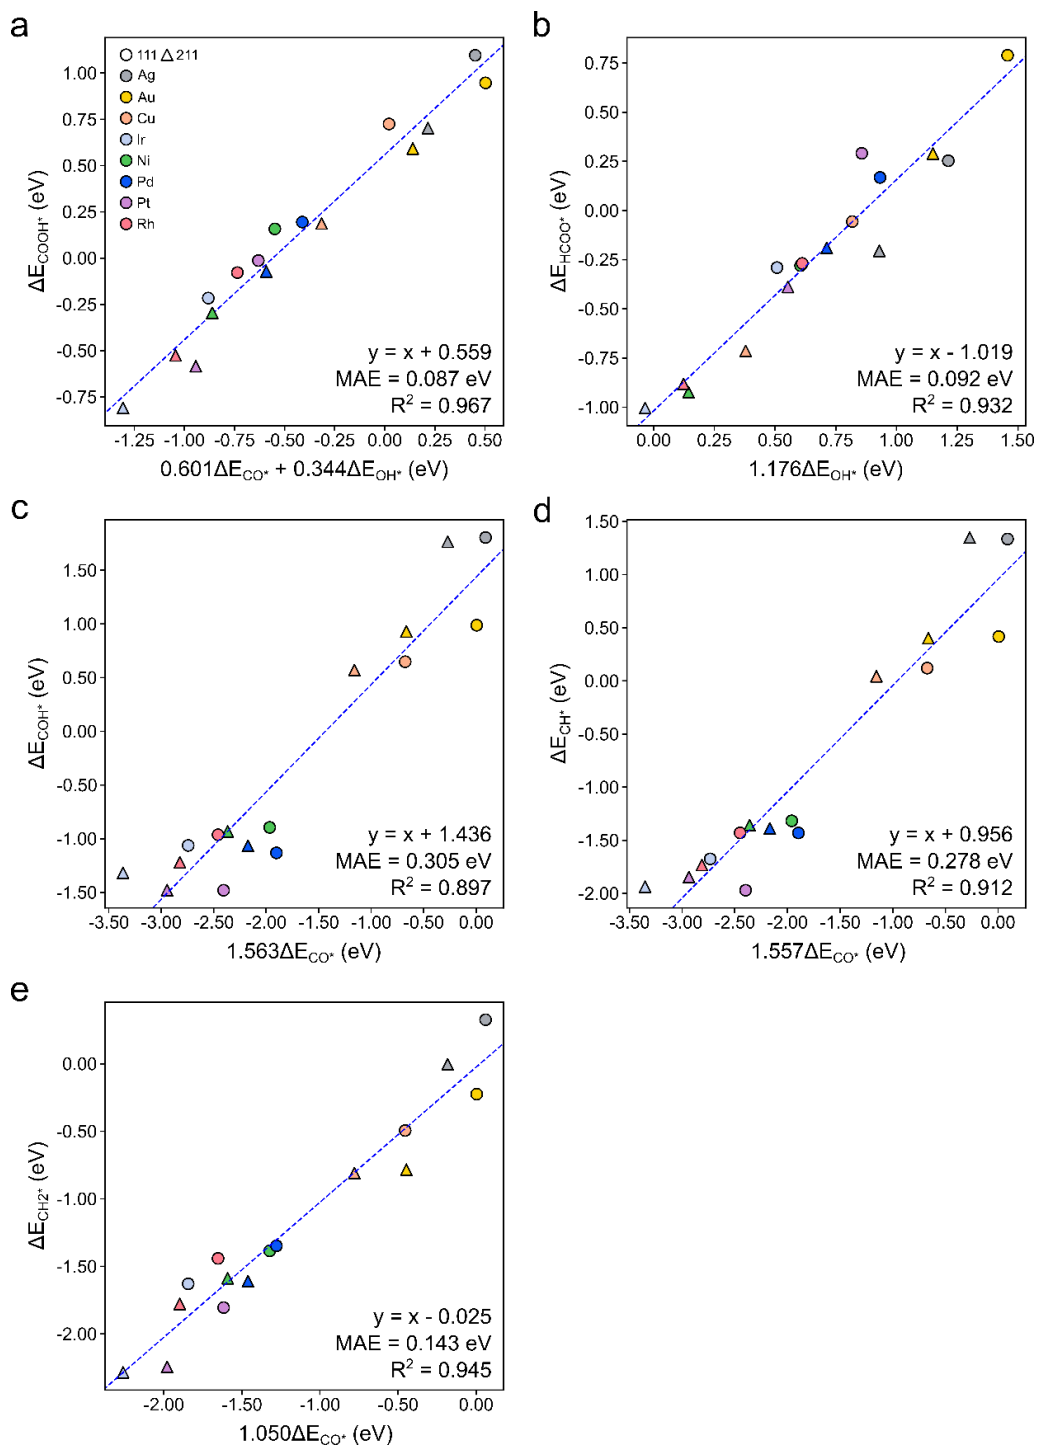

**Figure S5.** The scaling relations between adsorption energies of different reaction intermediates and combinations of descriptors ( $\Delta E_{CO^*}$  and  $\Delta E_{OH^*}$ ), along with their corresponding linear equations, mean absolute error (MAE) and  $R^2$  scores. (a)  $\Delta E_{COOH^*}$ , (b)  $\Delta E_{HCOO^*}$ , (c)  $\Delta E_{COH^*}$ , (d)  $\Delta E_{CH^*}$  and (e)  $\Delta E_{CH_2^*}$ .

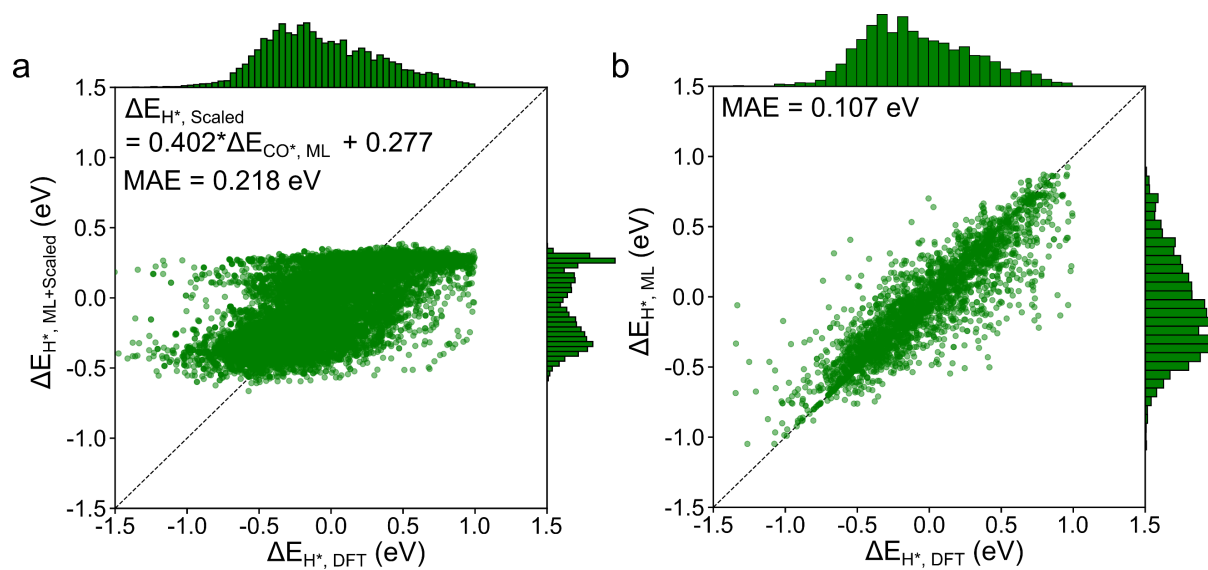

**Figure S6.** Parity plots of (a) the estimated ( $\Delta E_{H^*, ML+Scaled}$ ) and DFT calculated ( $\Delta E_{H^*, DFT}$ ) H\* binding energy, and (b) directly predicted ( $\Delta E_{H^*, ML}$ ) and DFT calculated ( $\Delta E_{H^*, DFT}$ ) H\* binding energy. The estimation is based on the ML predicted CO\* binding energy ( $\Delta E_{CO^*, ML}$ ) and the scaling relation between  $\Delta E_{CO^*}$  and  $\Delta E_{H^*}$ .

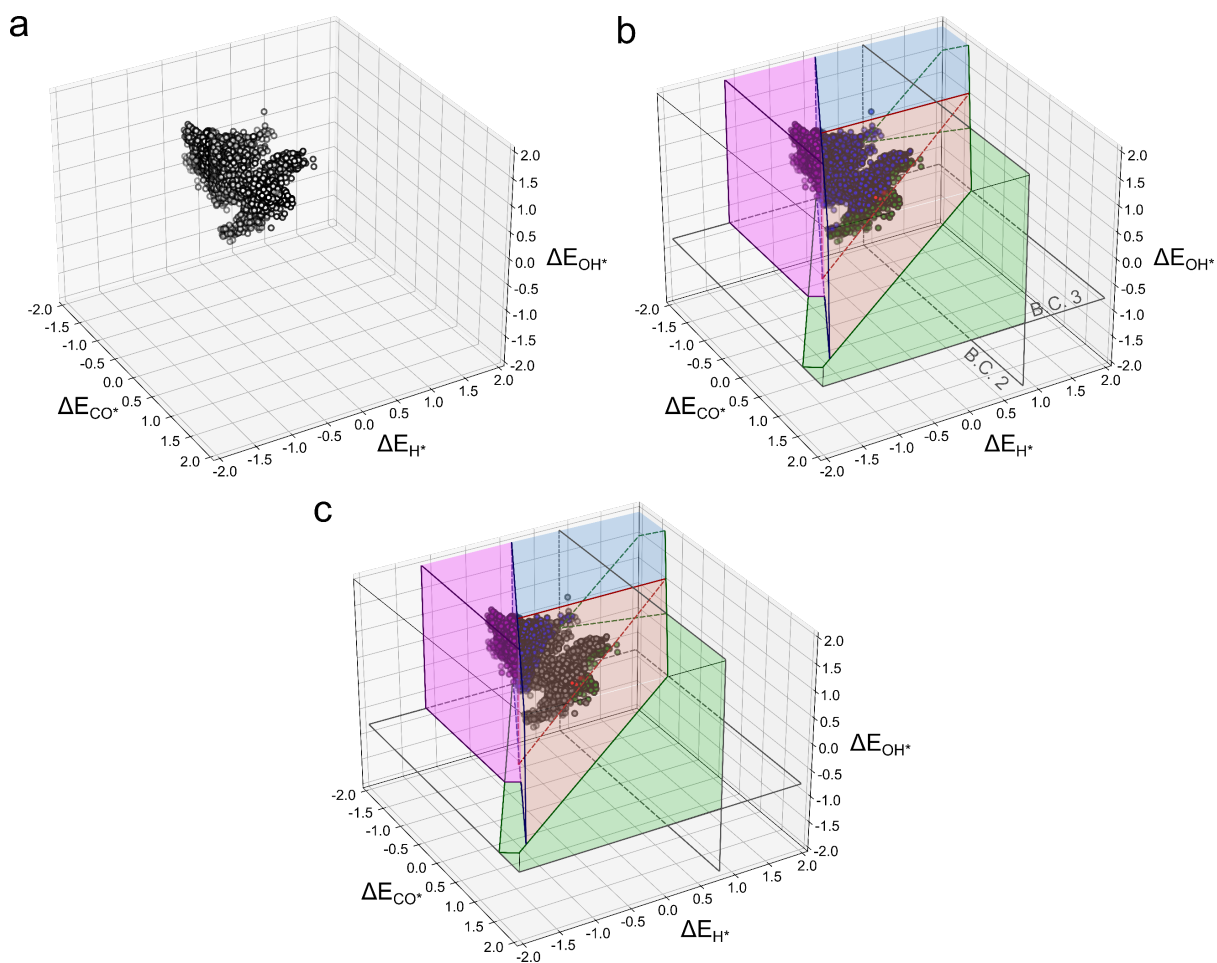

**Figure S7.** The example of utilizing selectivity map. (a) All unique active motifs are scattered in the map. Each point is converted into a cuboid volume, considering MAE of ML predictions. (b) The thermodynamic boundary conditions are applied and the volume in the map that each active motif occupies is identified. (c) The active motifs that do not satisfy the reaction energy condition ( $\Delta G_{\text{MAX}} < 0$  eV at the applied potential) are removed (grey). The remaining active motifs are used to calculate productivity of each product.

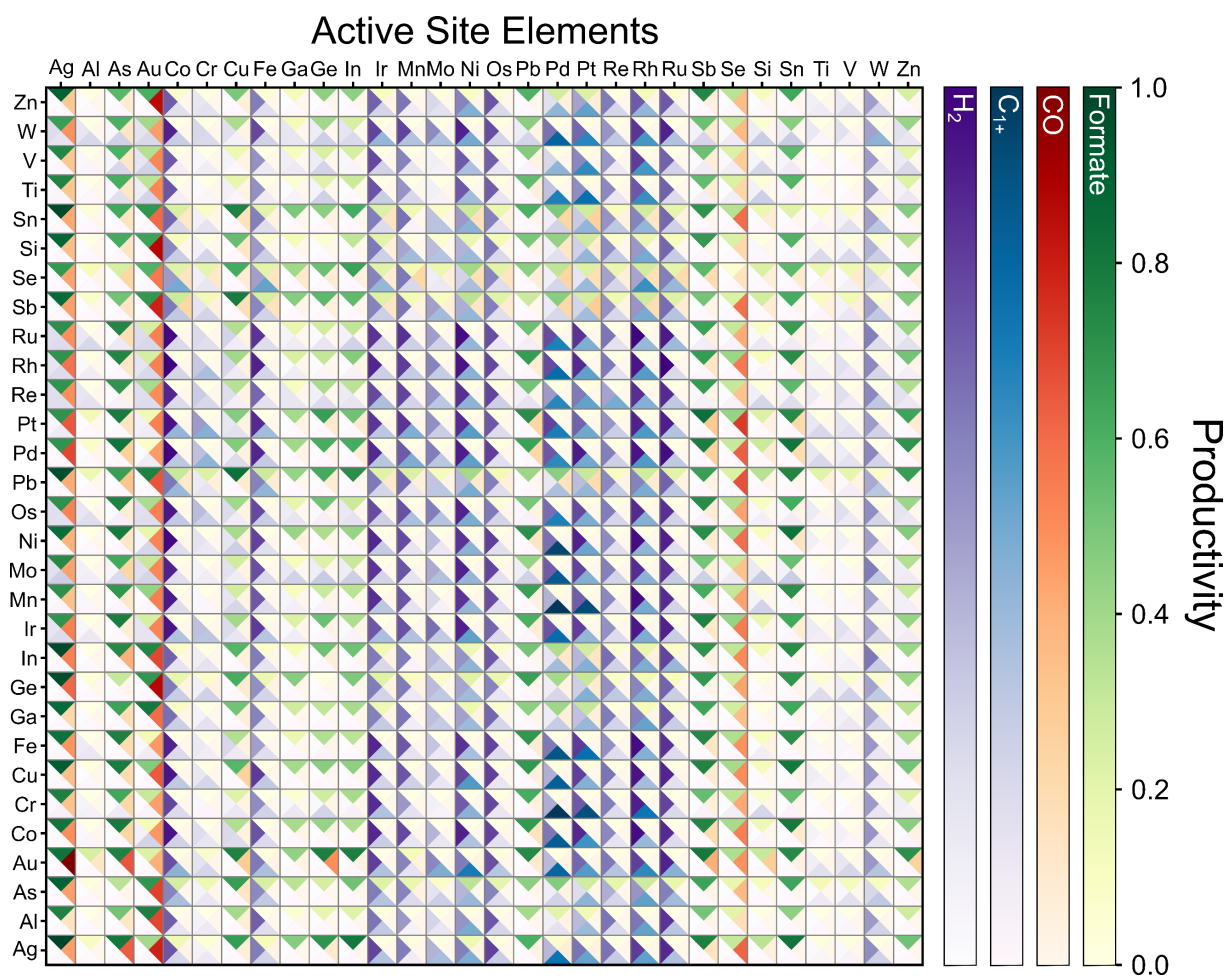

**Figure S8.** Productivity heatmap visualizing the normalized productivity; Formate (green, top),

CO (red, right), C<sub>1+</sub> (blue, bottom), H<sub>2</sub> (purple, left) at  $U = -1.0 \text{ V}_{\text{RHE}}$ .



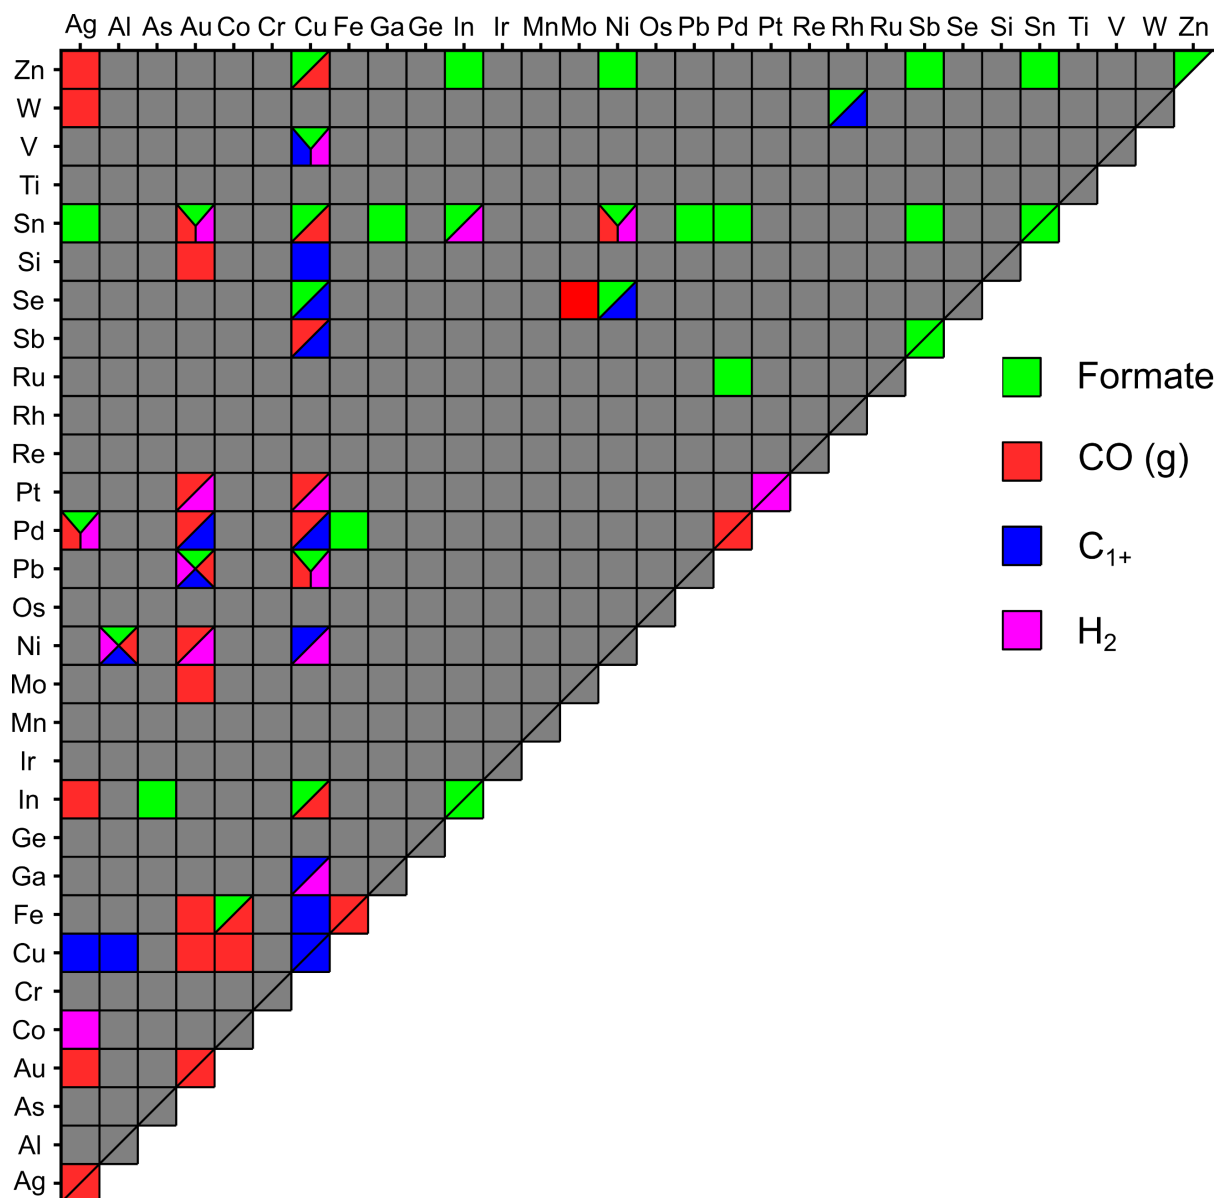

**Figure S9.** Heatmap visualizing electrochemical CO<sub>2</sub>RR products (Formate : Green, CO : Red, C<sub>1+</sub> : Blue, H<sub>2</sub> : Purple, Unknown : Gray) of metal alloys reported in literatures when searching for the keyword: “Carbon dioxide reduction catalyst” in Web of Science.

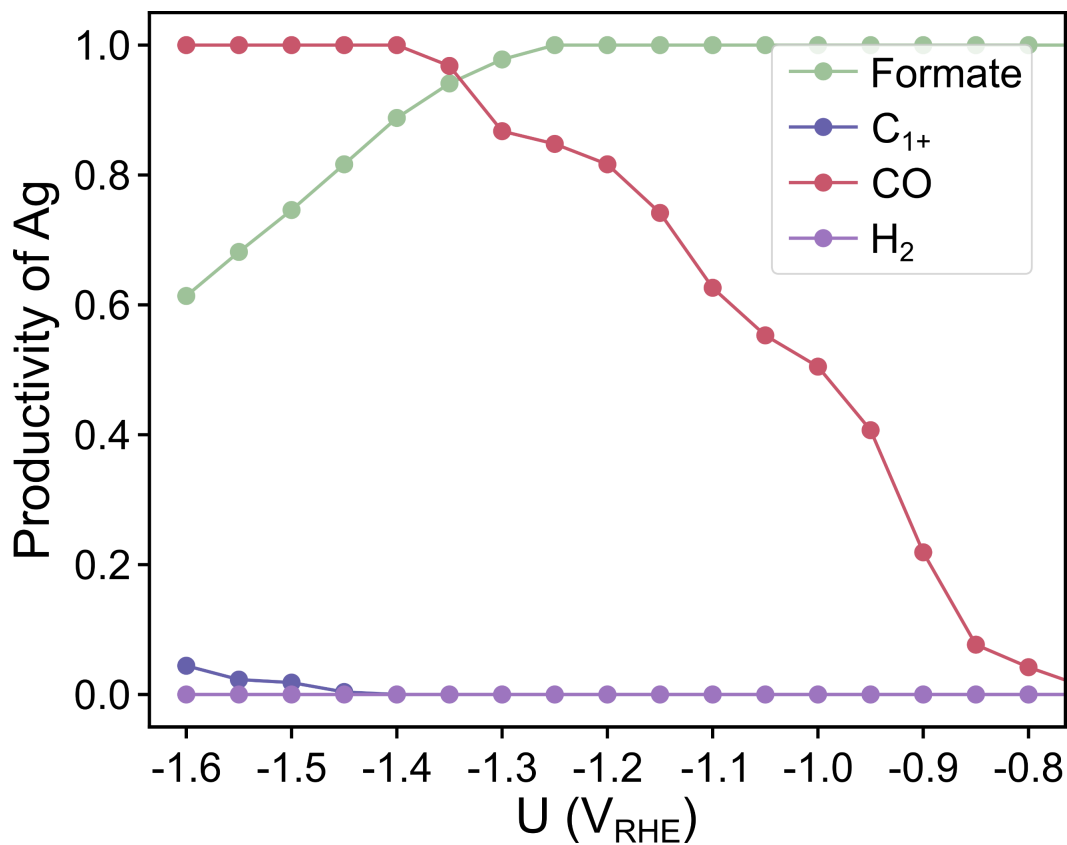

**Figure S10.** ML-predicted product selectivity of pure Ag. At potentials more positive than  $-1.3$   $V_{RHE}$ , the product selectivity for formate is dominant.

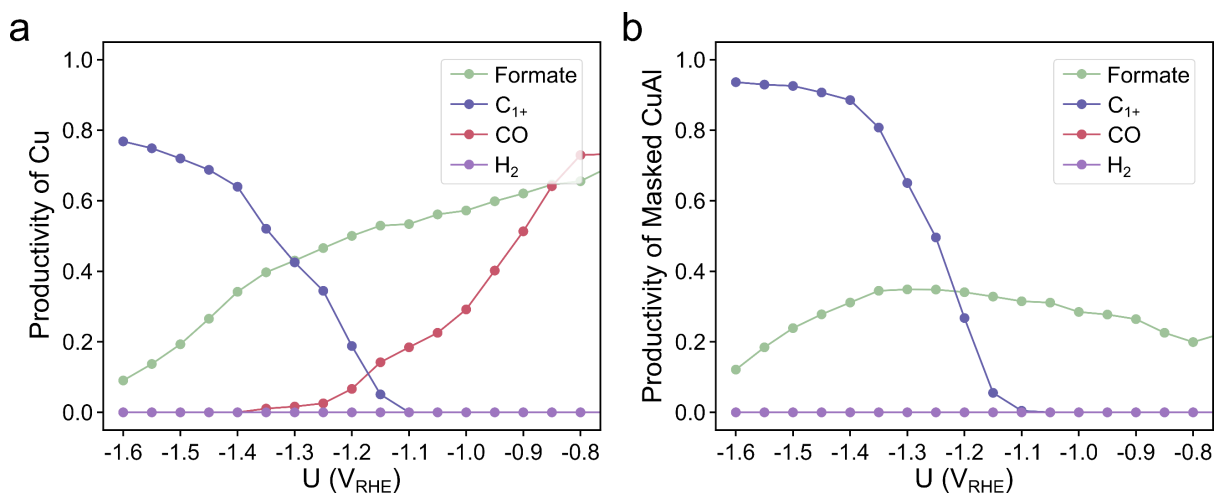

**Figure S11.** Productivity of (a) pure Cu and (b) masked Cu-Al without normalization. The active site, composition and CN conditions were applied in the case of masked Cu-Al.

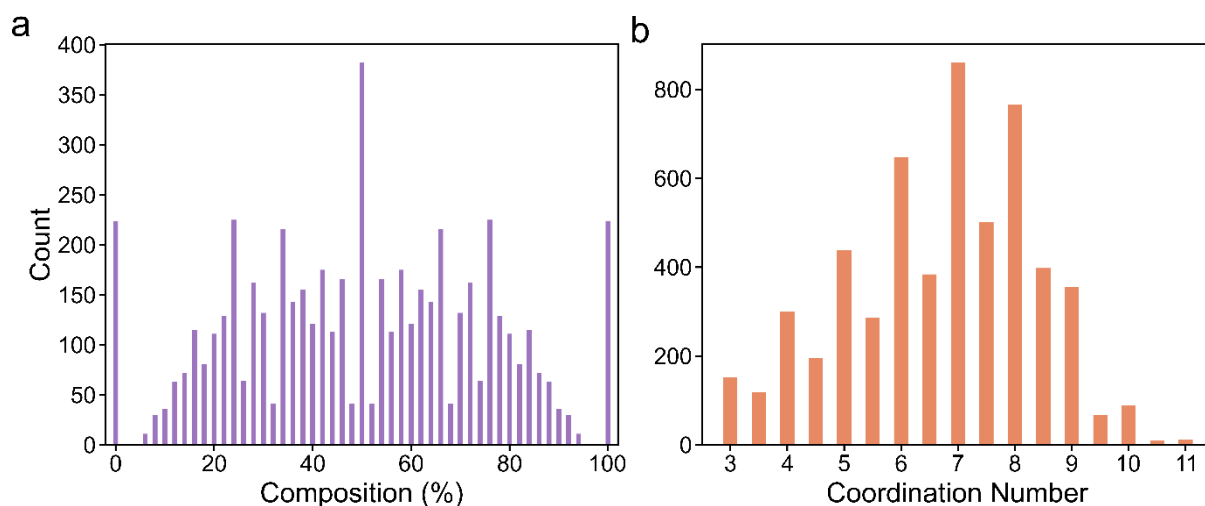

**Figure S12.** (a) Composition and (b) coordination number distribution of unique active motifs in the dataset.

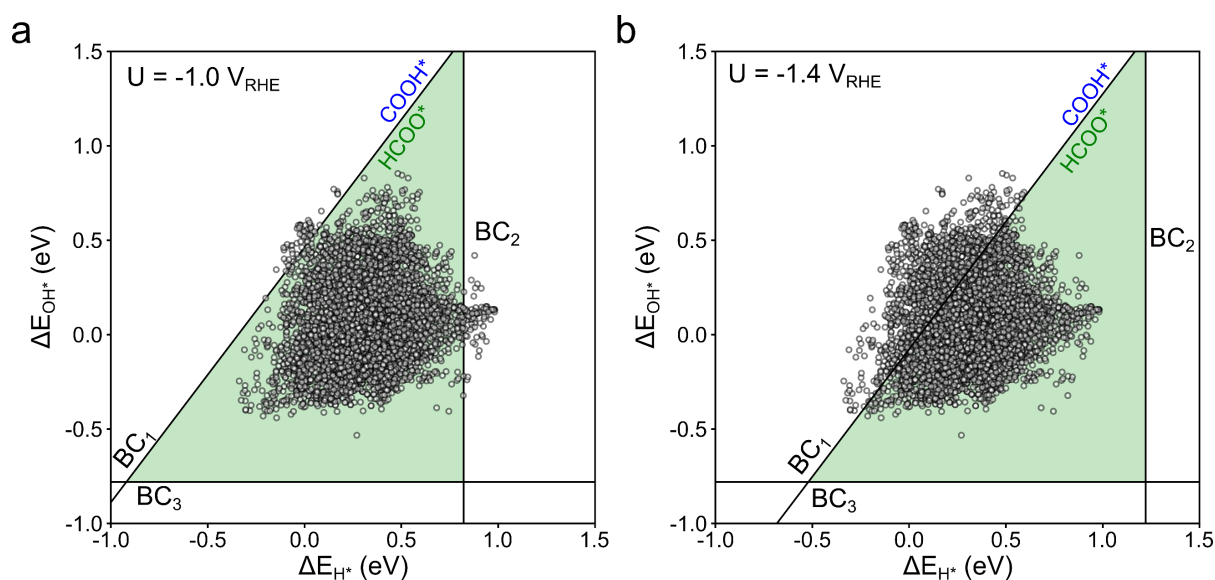

**Figure S13.** Predicted binding energies of Cu-Ga alloy scattered on 2D selectivity map at two applied potentials of (a)  $-1.0 \text{ V}_{\text{RHE}}$  and (b)  $-1.4 \text{ V}_{\text{RHE}}$ . Boundary condition 1, 2 and 3 ( $\text{BC}_1$ ,  $\text{BC}_2$  and  $\text{BC}_3$ ) are shown. The 2D selectivity map and the boundary conditions are derived using a fixed  $\Delta E_{\text{CO}^*}$  value of 0 eV to help intuitive understanding. The area colored as green indicates the region selective for formate. Some of the scattered points, originally located in the formate selective area at  $U = -1.0 \text{ V}_{\text{RHE}}$ , move out of the area at  $U = -1.4 \text{ V}_{\text{RHE}}$  due to the line shift by the potential change.

### Supplementary Note 3: CO<sub>2</sub>RR Evaluation on Cu-Ga Electrode

The Cu-Ga catalyst was prepared by one-step electroplating over a polished Cu foil substrate. In brief, the electropolished Cu foil was placed in a solution containing 20 mM gallium sulfate, 10 mM cupric sulfate, 0.5 M potassium pyrophosphate, and 0.1 M nitrilotriacetic acid. The plating bath pH was adjusted to ca. 8.5 using 0.1 M KOH solution. The Cu-Ga film was prepared by electrochemical deposition at -1.6 V vs. Ag/AgCl for 100 s in a stirred above-mentioned electrolyte. The as-plated films were rinsed with copious amounts of deionized water and dried by the nitrogen stream for subsequent measurements.

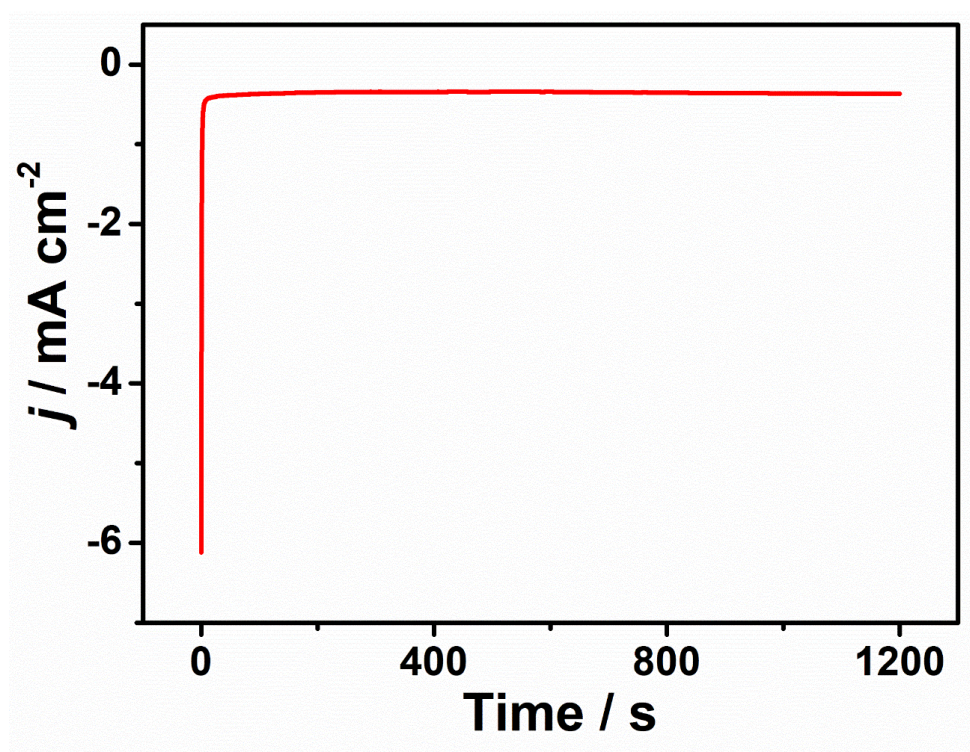

**Figure S14.** The electrochemical pre-reduction curve of Cu-Ga electrode at a fixed potential of -0.6 V vs. RHE in 0.1 M Ar-saturated CsHCO<sub>3</sub> solution for 1200 s.

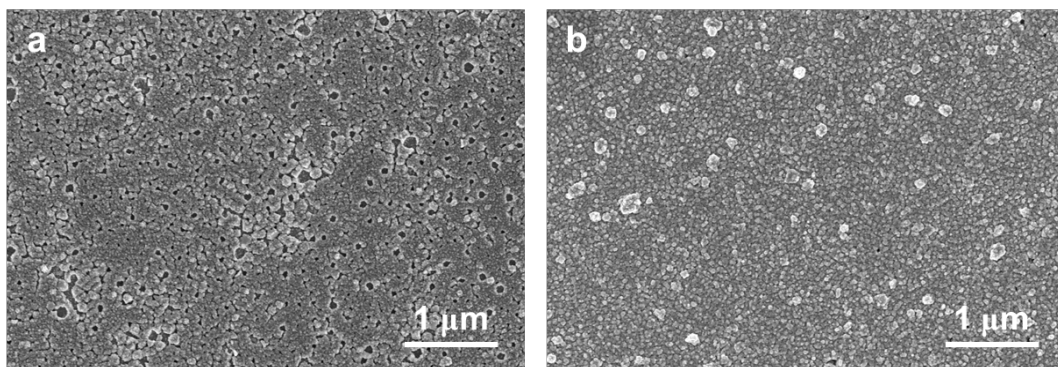

**Figure S15.** *Ex situ* SEM image of Cu-Ga electrode (a) before and (b) after two hours CO<sub>2</sub> electrolysis. In contrast to the relatively flat surface of polished Cu, the electroplated Cu-Ga electrode consists of densely packed nanoparticles.

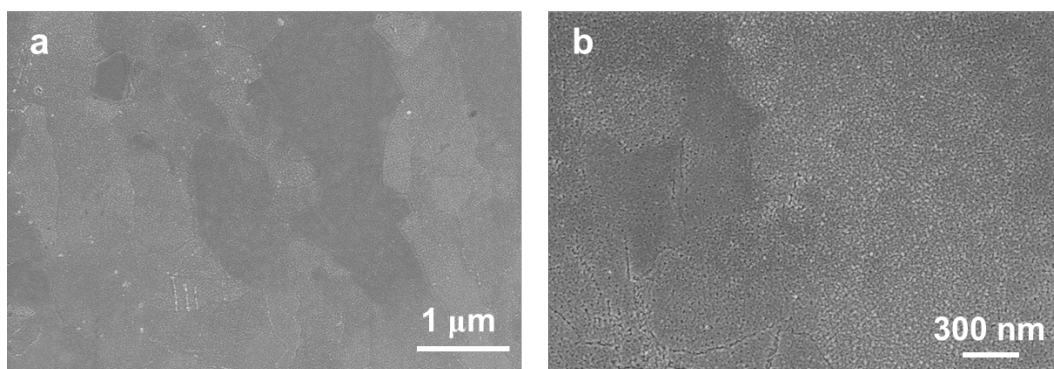

**Figure S16.** (a) *Ex situ* SEM image of polished Cu foil, (b) enlarged version from panel (a).

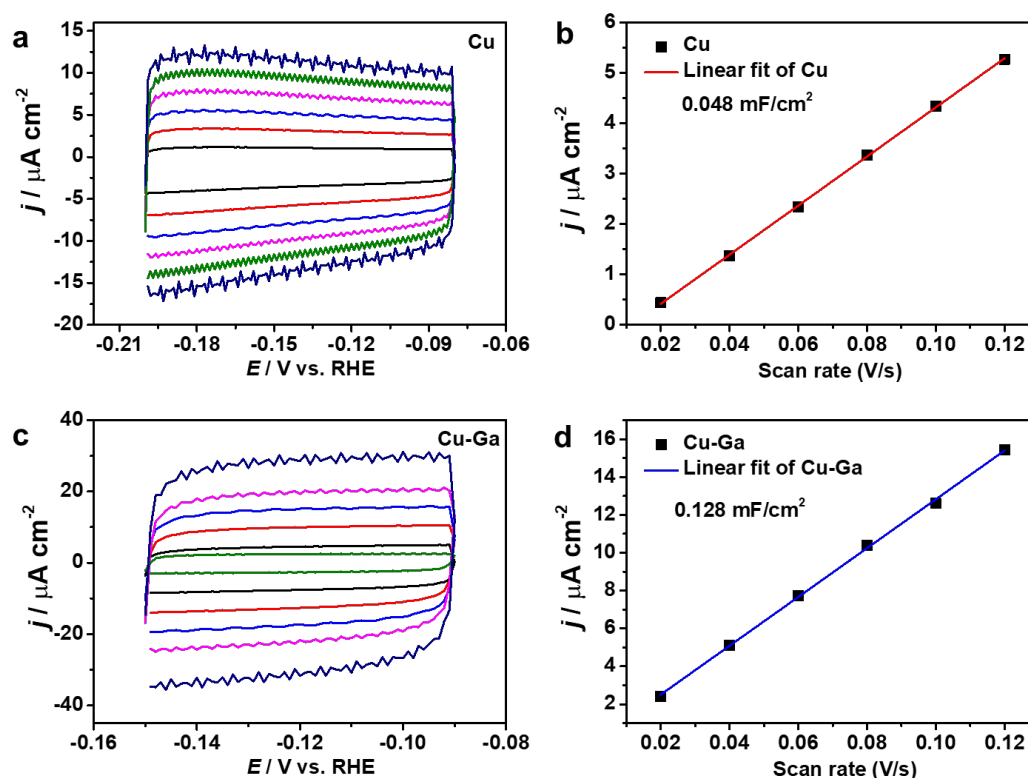

**Figure S17.** Electrochemical double layer capacitance measurements for (a, b) polished Cu foil and (c, d) Cu-Ga electrode after  $\text{CO}_2\text{RR}$  electrolysis at -0.95 V vs. RHE for 5400 s. The roughness factor of the Cu-Ga electrode is 2.67 times than the polished Cu electrode.

Prior to  $\text{CO}_2\text{RR}$  measurements, the Cu-Ga electrode was subjected to a pre-reduction at -0.6 V in 0.1 M Ar-saturated  $\text{CsHCO}_3$  for 1200 s toward a stable surface state (**Figure S14**). Typical SEM images in **Figure S15a** and **S15b** depict the morphology of Cu-Ga catalyst before and after  $\text{CO}_2\text{RR}$  electrolysis, respectively. In contrast to the relatively flat surface of polished Cu (**Figure S16**), the electroplated Cu-Ga consists of densely packed nanoparticles, which contributes to the 2.67-times higher surface roughness compared to bare Cu (**Figure S17**).

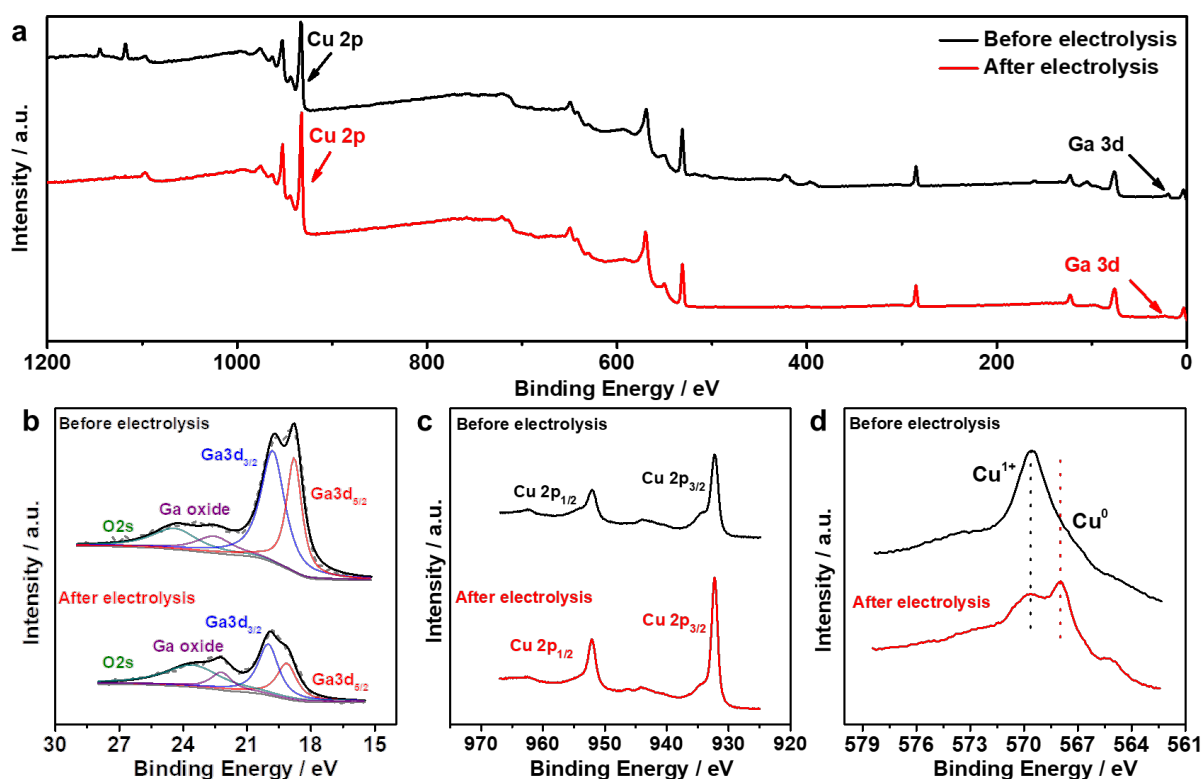

**Figure S18.** Comparison of the XPS spectra over Cu-Ga electrode before and after CO<sub>2</sub>RR electrolysis. (a) XPS survey spectra, (b) core-level Ga 3d spectra overlapped with O 2s, (c) Cu 2p and (d) LMM Auger spectra. Partially oxidized Cu surface species noted in the LMM spectra are probably arisen from the exposure to air during sample transfer process.

X-ray photoelectron spectroscopy (XPS) measurements were then carried out to probe the near-surface compositional evolution. As shown in **Figure S18**, only C, O, Cu and Ga signals were observed in the *ex situ* XPS survey spectra, where the atomic ratio of Cu to Ga decreased from 2.1:1 to 5.3:1 after electrochemical reduction (**Table S8**), probably due to the liquid nature of metallic Ga that leaches away from electrode surface into electrolyte under CO<sub>2</sub>RR conditions. Noteworthy, this near-surface Ga content is much higher than the bulky ratio as probed by energy dispersive spectroscopy (EDS), suggestive the surface enrichment of Ga in the Cu-Ga electrode (**Figure S19**).



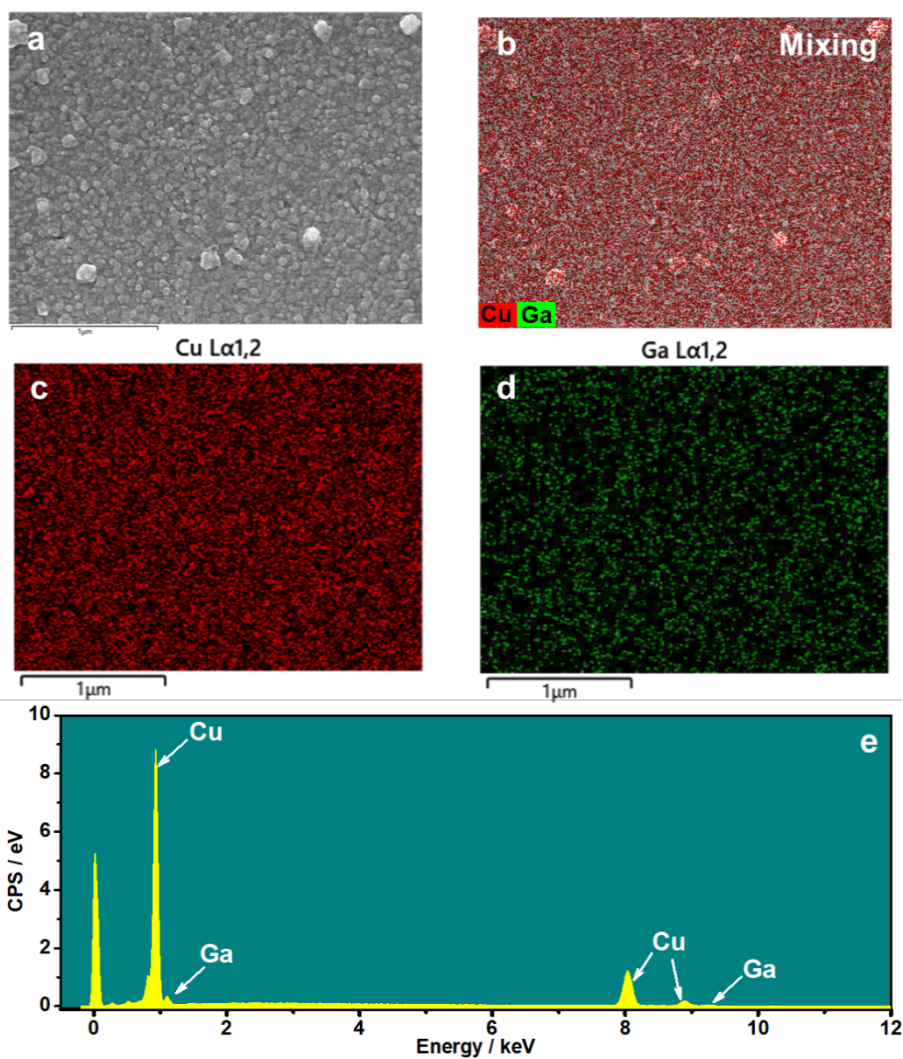

**Figure S19.** The EDS mapping and spectrum of Cu-Ga electrode after CO<sub>2</sub>RR electrolysis. (a) SEM image, (b) Mixing element, (c) Cu element, (d) Ga element, and (e) EDS spectrum. Noteworthy, this near-surface Ga content is much higher than the bulky ratio (**Table S9**) as probed by energy dispersive spectroscopy (EDS), suggestive the surface enrichment of Ga in the Cu-Ga electrode.



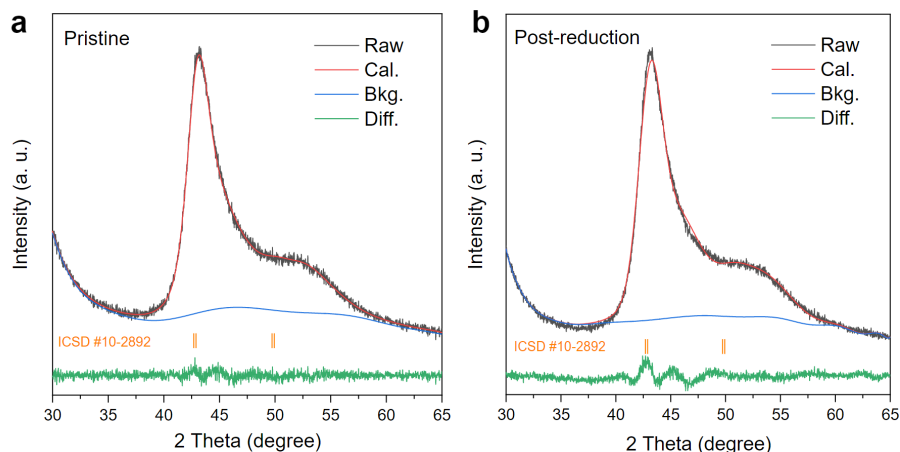

**Figure S20.** GI-XRD patterns of (a) pristine and (b) spent Cu-Ga electrode after CO<sub>2</sub>RR electrolysis. Rietveld refinement has been applied to quantitatively probe the crystalline structure (**Table S9**). In line with the reference of Cu<sub>0.85</sub>Ga<sub>0.15</sub> ICSD #10-2892, both pristine and spent Cu-Ga electrodes share the same *Fm-3m* space group, reinforcing the alloying structure. The spent Cu-Ga electrode exhibits a smaller cell volume compared to that for pristine Cu-Ga, as due to the gradually leaching of metallic Ga content during CO<sub>2</sub>RR and in good harmony with our previous XPS and EDS results.

Grazing-incidence X-ray diffraction (GI-XRD) at  $\alpha = 0.5^\circ$  has been carried to better characterize the alloying structure for the Cu-Ga electrodes before and post CO<sub>2</sub>RR electrolysis. As shown in **Figure S20**, two major peaks at 42.7° and 49.8° are noted for both the pristine and spent Cu-Ga electrodes deposited on glassy carbon substrates, corresponding to the (111) and (200) diffraction features of Cu<sub>0.85</sub>Ga<sub>0.15</sub> (ICSD#10-2892) alloy, respectively. Additionally, both pristine and spent Cu-Ga electrodes share the same *Fm-3m* space group, reinforcing the alloying structure. The spent Cu-Ga electrode exhibits a smaller cell volume compared to that for pristine Cu-Ga (**Table S9**), as due to the gradually leaching of metallic Ga content during CO<sub>2</sub>RR and in good harmony with our previous XPS and EDS results.

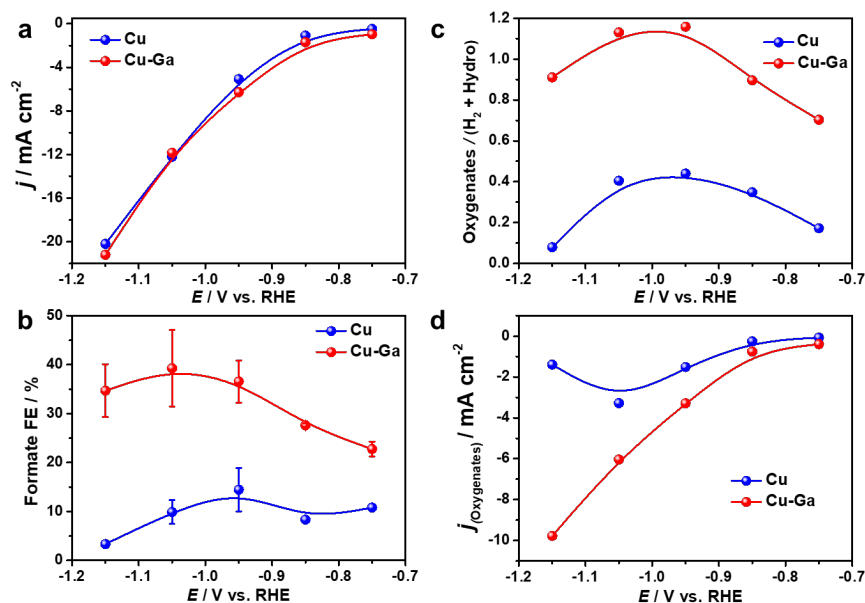

**Figure S21.** (a) Steady-state current densities, together with (b) the Faradaic efficiency of formate, (c) the selectivity ratio of oxygenates to the sum of H<sub>2</sub> and hydrogenates, and (d) the partial current density of oxygenates on polished Cu versus plated Cu-Ga electrodes under different applied potentials.

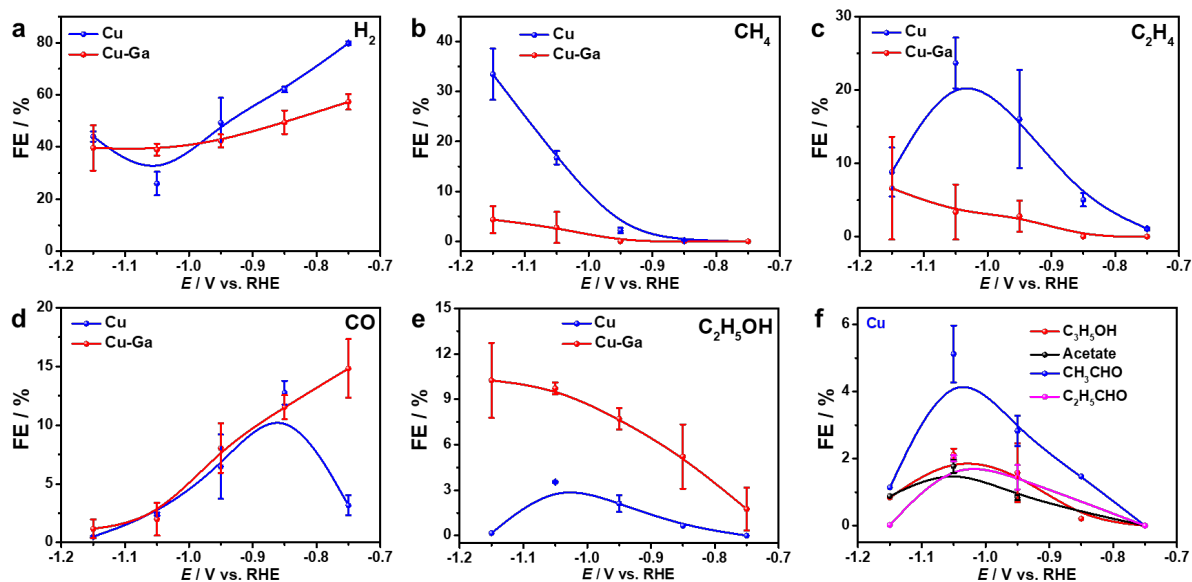

**Figure S22.** Faradaic efficiency for CO<sub>2</sub> electroreduction products at different applied potential for polished Cu and Cu-Ga electrodes. (a) H<sub>2</sub>, (b) CH<sub>4</sub>, (c) C<sub>2</sub>H<sub>4</sub>, (d) CO, (e) C<sub>2</sub>H<sub>5</sub>OH, (f) other products for polished Cu electrode.

The CO<sub>2</sub>RR performance was then screened in 0.1 M CO<sub>2</sub>-saturated CsHCO<sub>3</sub> electrolyte for polished Cu and plated Cu-Ga, with the gaseous and the liquid products quantitatively analyzed by online gas chromatography and <sup>1</sup>H nuclear magnetic resonance (NMR) spectroscopy, respectively. As plotted in **Figure S21**, similar steady-state current densities were noted on those two electrodes throughout the potential window of interest, however, the selectivity of products is quite different (**Figure S22**). A higher H<sub>2</sub> Faradaic efficiency (FE) was observed on Cu over Cu-Ga at small overpotential regime, whereas at more negative potentials below -0.95 V, Cu electrode delivers a lower H<sub>2</sub> FE but significantly higher hydrocarbon generation of CH<sub>4</sub> and C<sub>2</sub>H<sub>4</sub> compared to those on Cu-Ga. In contrast, Cu-Ga catalyst favors the liquid oxygenates generation including formate and ethanol. As shown in **Figure S21b**, Cu-Ga delivers a maximum formate FE of ~38.4% at -1.05 V vs. RHE, which is 4 times as high as that on bare Cu. **Figure S21c** plots the ratio of oxygenates to the sum of H<sub>2</sub> and hydrocarbons as a function of cathodic potential, highlighting the promoted oxygenates selectivity on Cu-Ga alloy. Moreover, **Figure S21d** depicts the potential dependence of oxygenates partial current density, in which Cu-Ga delivers ~7 times higher  $j_{\text{oxygenates}}$  than bare Cu at -1.15 V, experimentally confirming ML-predicted and DFT-calculated results. Considering the mass transport limitation of CO<sub>2</sub> in aqueous solution, we did not continue to measure CO<sub>2</sub>RR products distribution below -1.2 V.

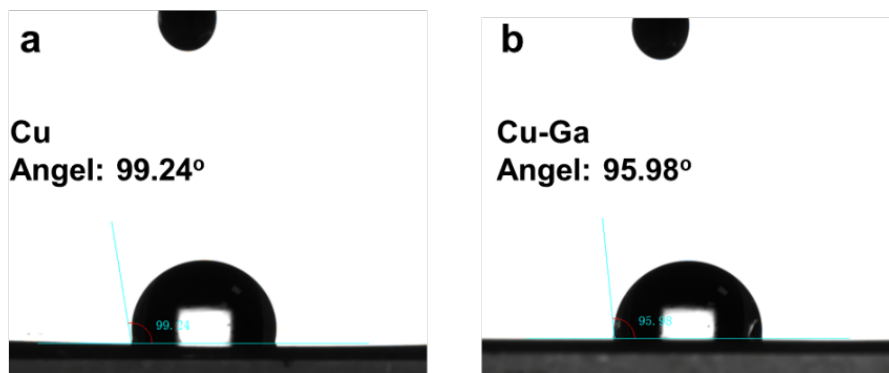

**Figure S23.** The contact angel of (a) polished Cu and (b) plated Cu-Ga electrodes. Compared to bare Cu, the slightly lower contact angel on plated Cu-Ga electrode suggests its enhanced surface hydrophilicity.

Last but not least, we considered the potential surface hydrophilic effect on formate selectivity. As shown in **Figure S23**, a slightly lower contact angel was noted on Cu-Ga compared to bare Cu, suggesting an enhanced surface hydrophilicity of the former which may synergistically contribute to enhance the CO<sub>2</sub>-to-formate selectivity arisen from the surface hydride mechanism.<sup>3,4</sup> Nevertheless, the similar potential dependence of CO selectivity on Cu and Cu-Ga, as well as the difference in products distribution of hydrocarbons and ethanol highlights the dominant effect of Ga-doping in tuning CO<sub>2</sub>RR pathways.

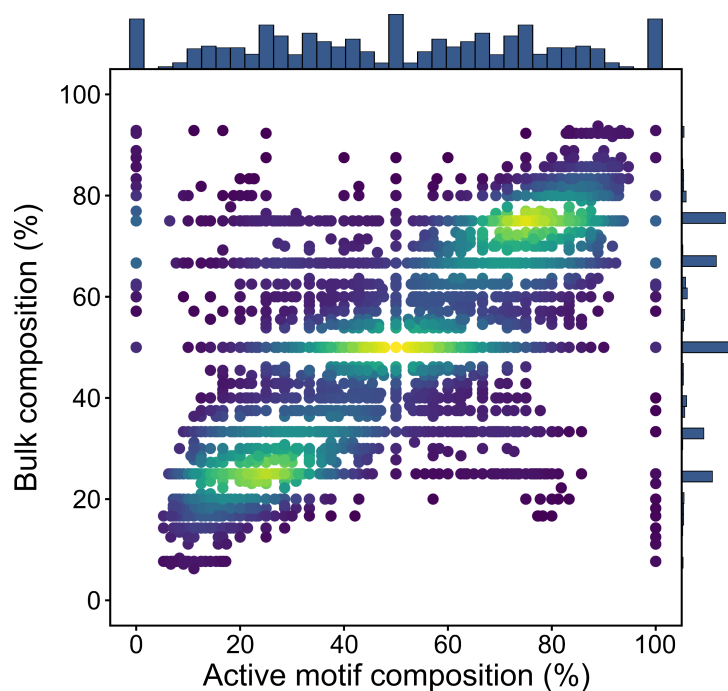

**Figure S24.** Parity plot of bulk and active motif composition. The lighter color indicates a high density of points.

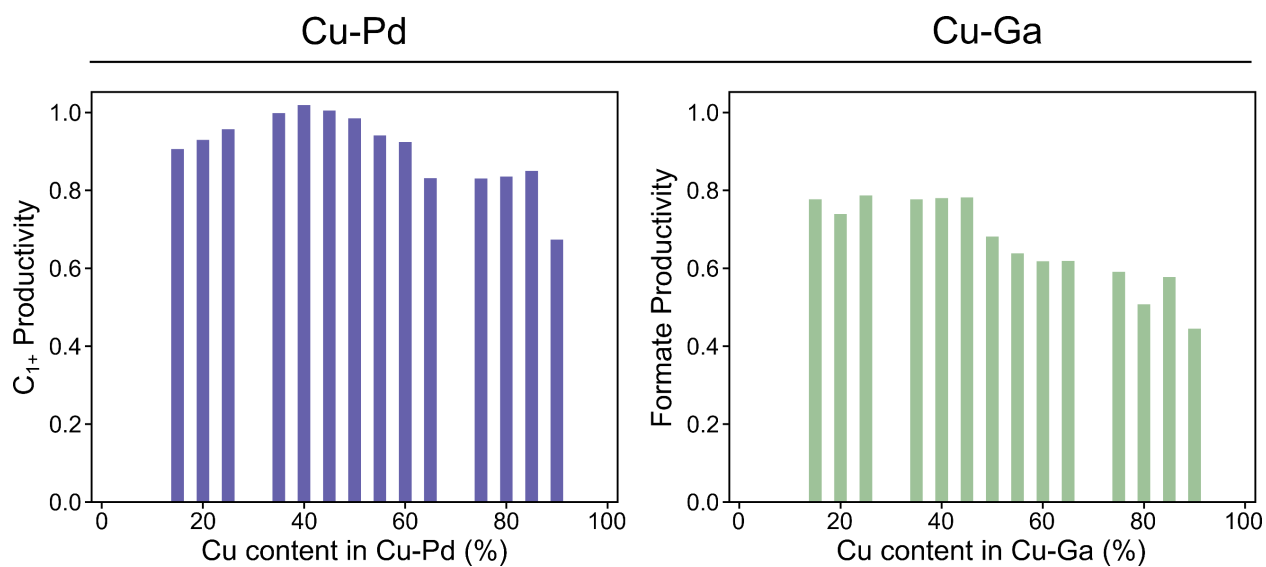

**Figure S25.** Composition-dependent  $C_{1+}$  productivity of Cu-Pd and formate productivity of Cu-Ga at  $-1.4 V_{RHE}$  when compositions were derived from bulk structures.

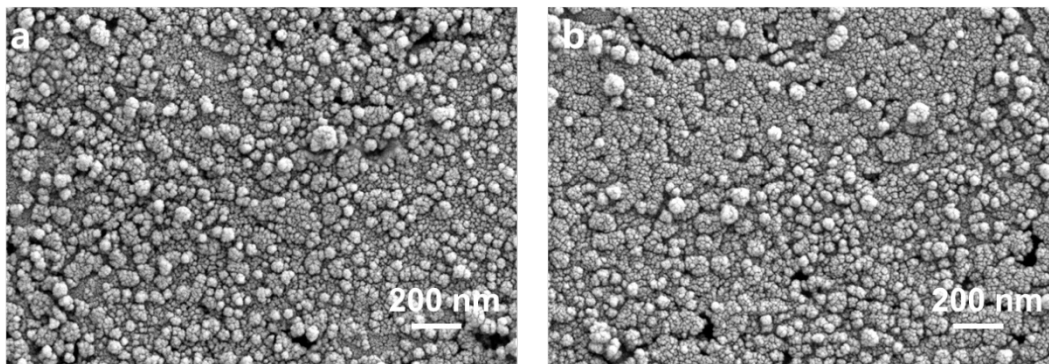

**Figure S26.** *Ex situ* SEM image of Cu-Pd electrode (a) before and (b) after 2-h CO<sub>2</sub> electrolysis.

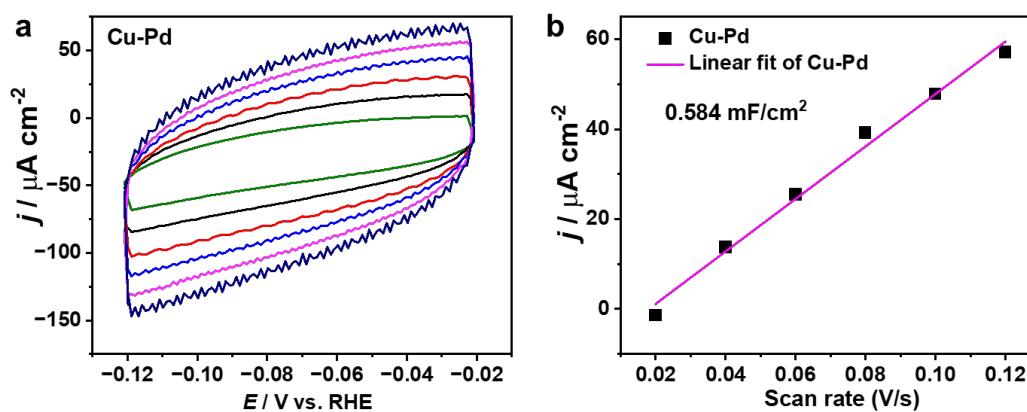

**Figure S27.** Electrochemical double layer capacitance measurements for (a, b) Cu-Pd electrode. Given the EDLC of 0.048 mF/cm<sup>2</sup> for polished Cu foil (**Figure S22**), the roughness factor of Cu-Pd electrode is 12.16 times as high as that of polished Cu.

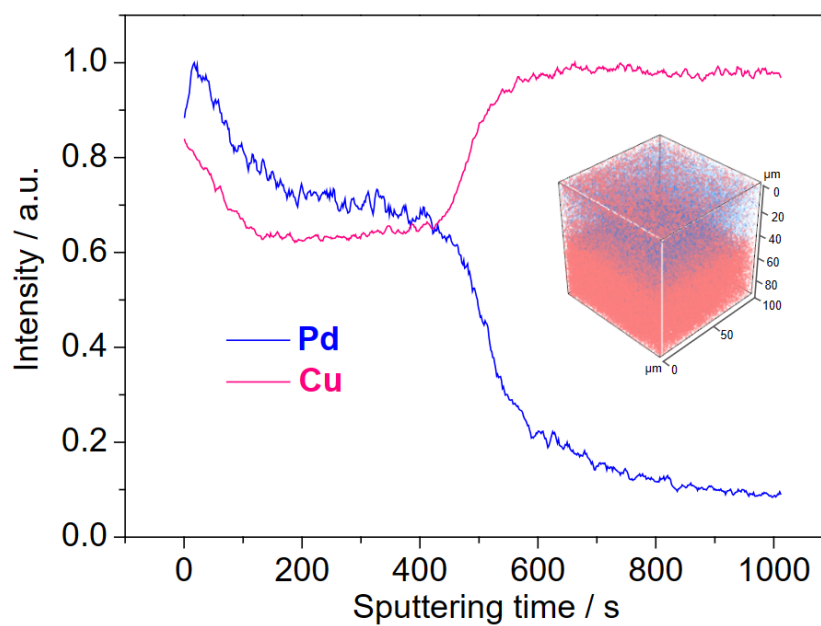

**Figure S28.** Depth profile of TOF-SIMS measurement on as-prepared Cu-Pd electrode. Insert shows the overlapped distribution of Cu (reddish) and Pd (blue) components.

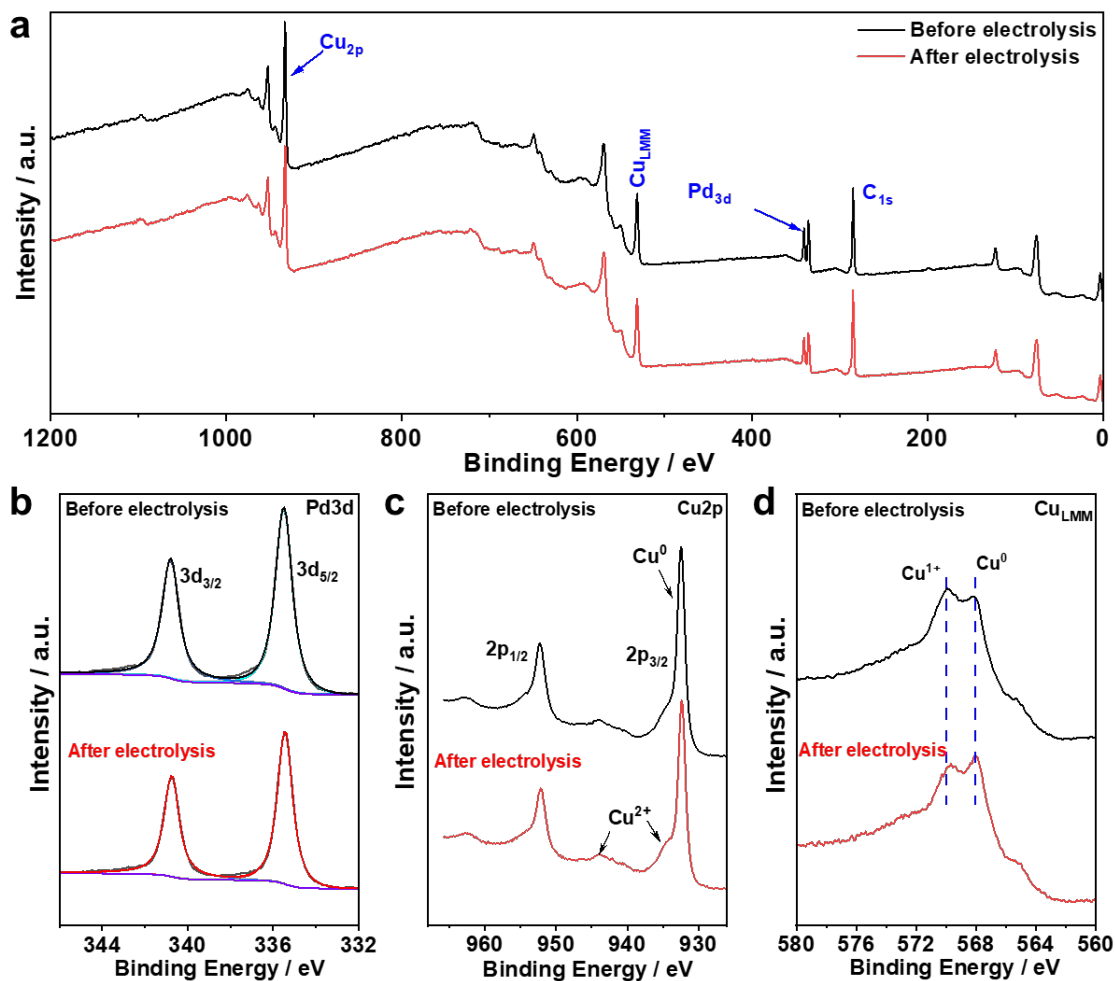

**Figure S29.** Comparison of the XPS spectra over Cu-Pd electrode before and after CO<sub>2</sub>RR electrolysis. (a) XPS survey spectra, (b) core-level Pd 3d spectra, (c) Cu 2p and (d) LMM Auger spectra. Partially oxidized Cu surface species noted in the LMM spectra probably arose from the exposure to air during sample transfer process. The near surface ratio of Cu:Pd slightly increases from 4:1 for pristine electrode to ~ 4.5:1 after CO<sub>2</sub>RR electrolysis, suggesting a relatively stable feature of Cu-Pd alloy.



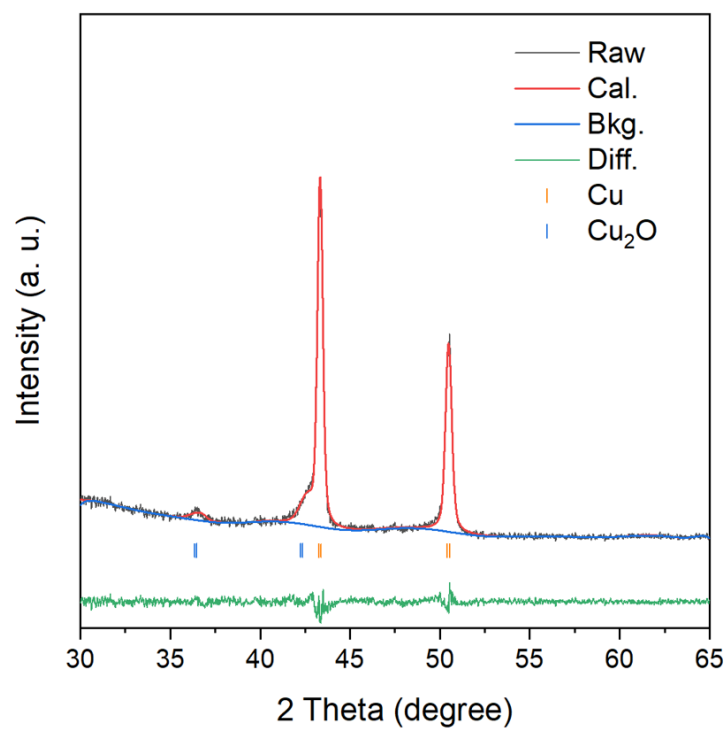

**Figure S30.** GI-XRD pattern of as-deposited Cu-Pd electrode with Rietveld refinement. Both metallic Cu (ICSD#67-0301) and Cu<sub>2</sub>O (ICSD#26-1853) components were observed, but at the absence of Cu-Pd alloy phase.

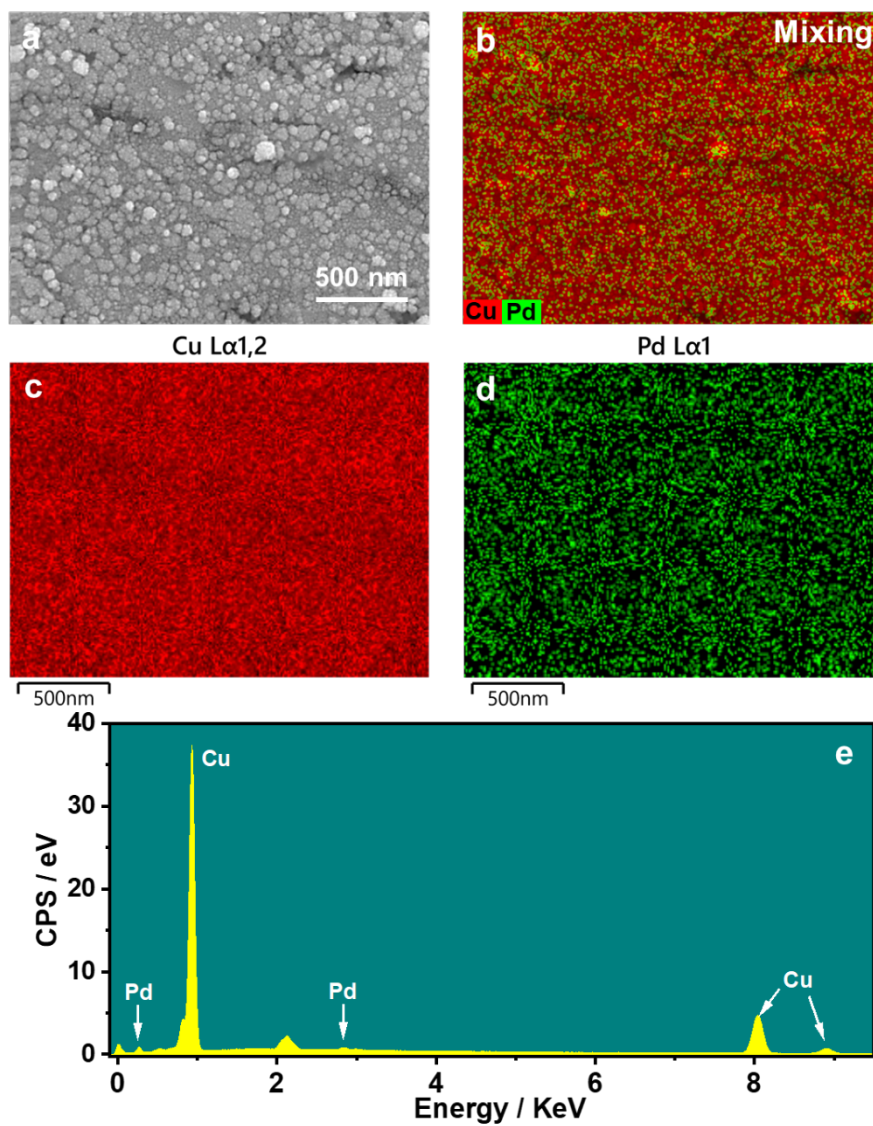

**Figure S31.** SEM image and relevant EDS mapping for Cu-Pd electrode after CO<sub>2</sub>RR. (a) SEM image, (b) mixed element distribution, (c) Cu and (d) Pd element mapping, and (e) EDS spectrum.

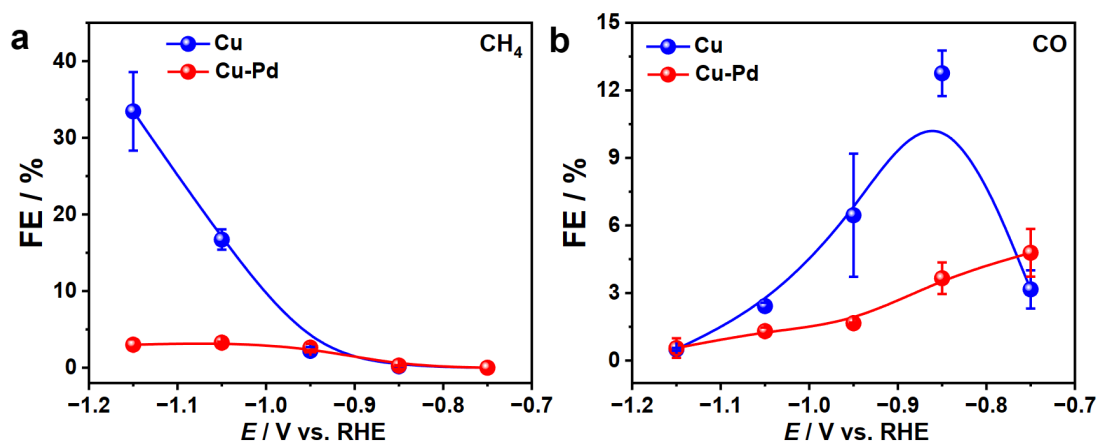

**Figure S32.** Faradaic efficiency for CO<sub>2</sub> electroreduction gas products at different applied potential for polished Cu and Cu-Pd electrodes. (a) CH<sub>4</sub> (b) CO.

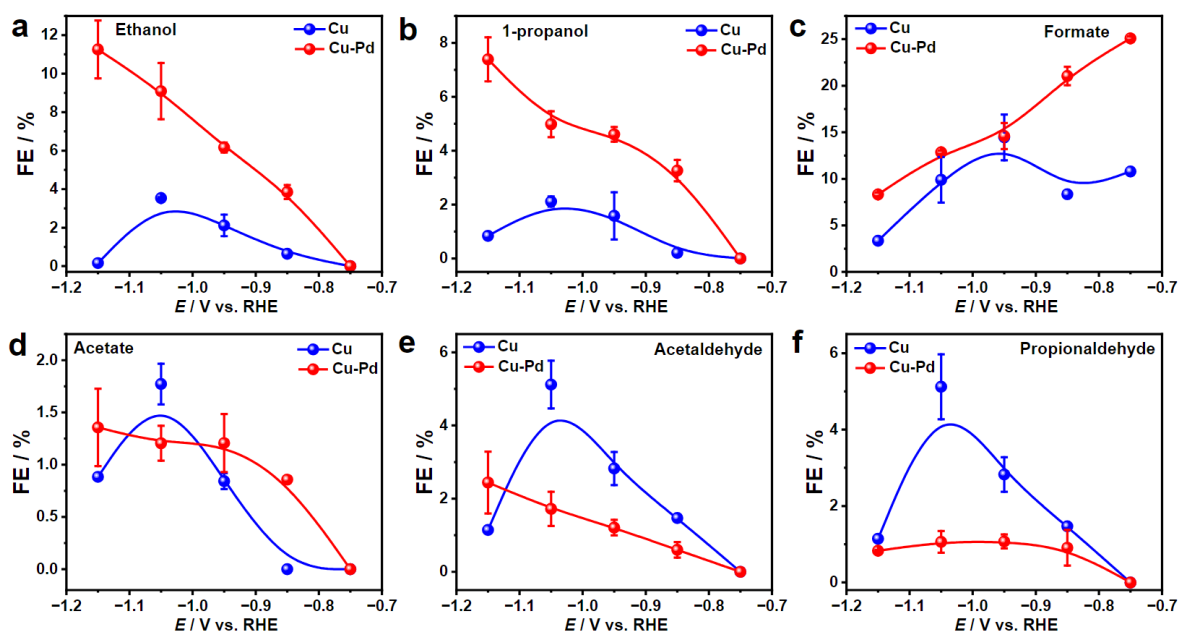

**Figure S33.** Faradaic efficiency for CO<sub>2</sub> electroreduction liquid products at different applied potential for polished Cu and Cu-Pd electrodes. (a) ethanol, (b) 1-propanol, (c) formate, (d) acetate, (e) acetaldehyde, (f) propionaldehyde.

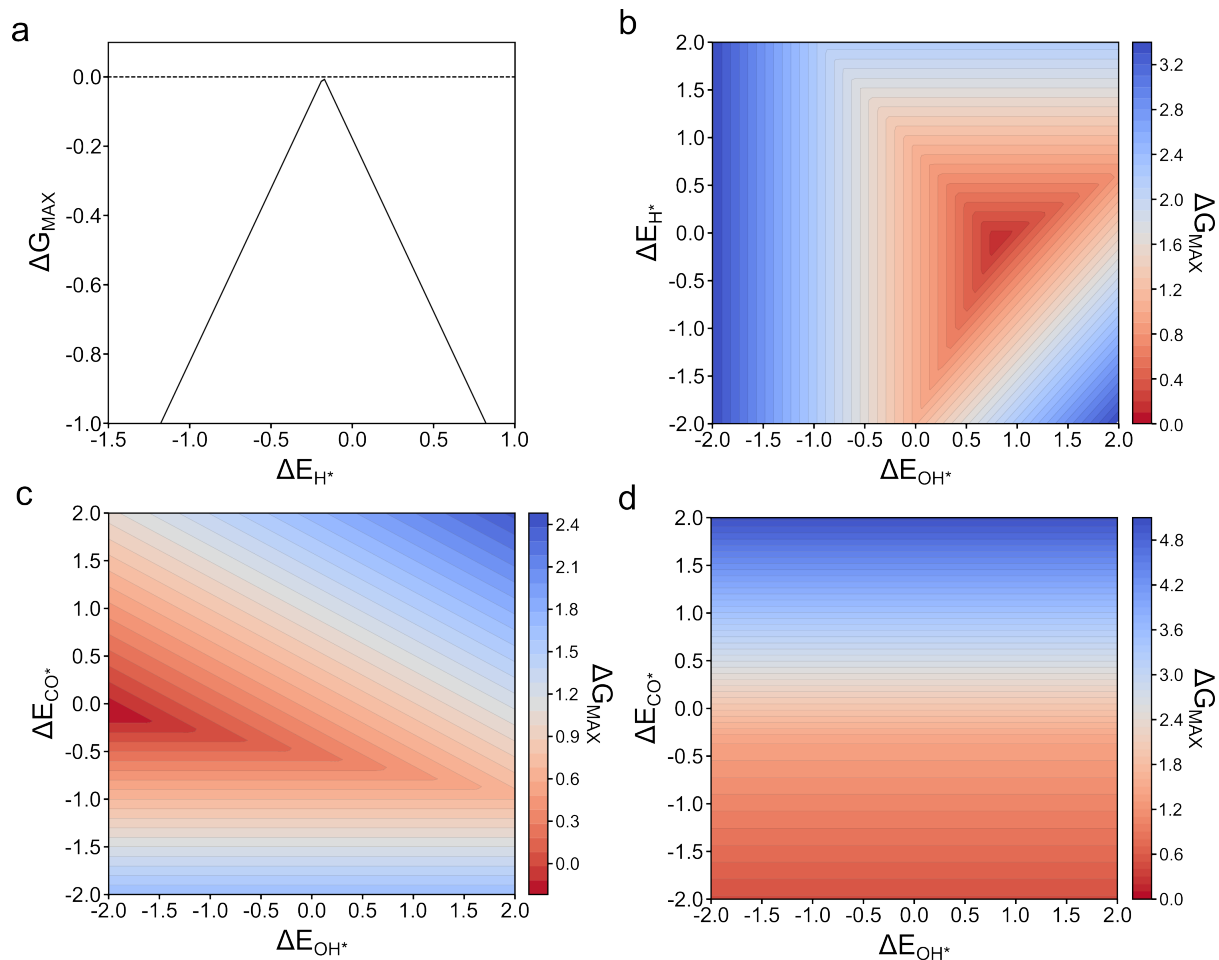

**Figure S34.** One and two-dimensional diagrams to illustrate how the maximum reaction energy ( $\Delta G_{MAX}$ ) for (a)  $H_2$ , (b) formate, (c) CO and (d)  $C_{1+}$  production changes in terms of three binding energy descriptors at 0  $V_{RHE}$  of the applied potential.

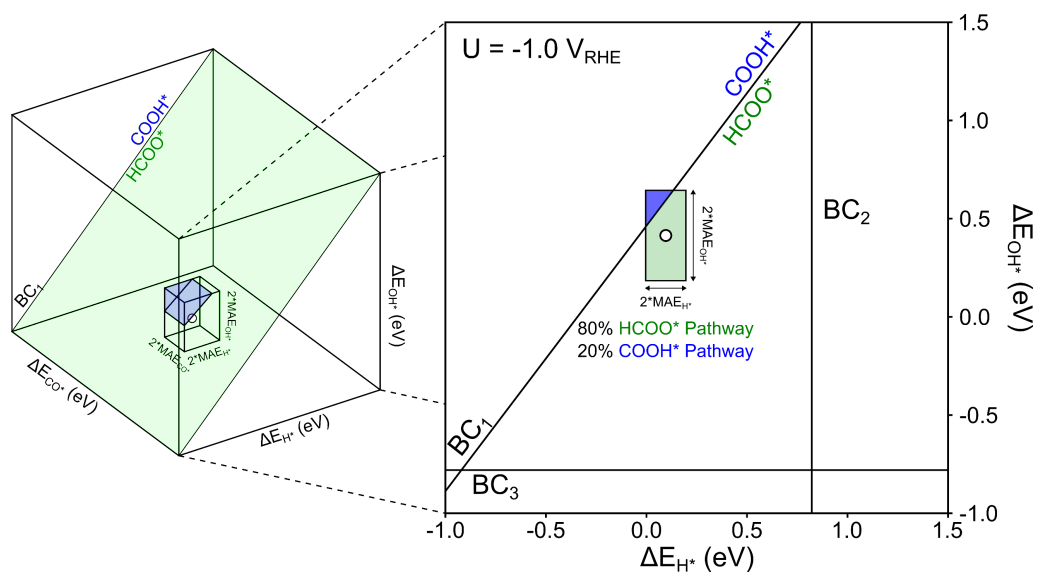

**Figure S35.** An example of uncertainty contribution for a point near the boundary condition in the 2D projections (right) of 3D selectivity map (left). The uncertainty caused by the ML prediction is represented as a volume based on the MAE of each ML model. Since the volume intersects with the boundary condition, the active motif also contributes to the productivity of the product from another pathway (COOH\*) along with the predicted pathway (HCOO\*).

**Table S1.** The mean absolute errors (eV) of each split of 5-fold cross validation.

|    | Split 1 | Split 2 | Split 3 | Split 4 | Split 5 | Avg.  | Std.  |
|----|---------|---------|---------|---------|---------|-------|-------|
| CO | 0.121   | 0.118   | 0.118   | 0.115   | 0.119   | 0.119 | 0.002 |
| H  | 0.105   | 0.104   | 0.110   | 0.109   | 0.105   | 0.107 | 0.003 |
| OH | 0.241   | 0.227   | 0.220   | 0.218   | 0.231   | 0.227 | 0.009 |

**Table S2.** Top 20 active and selective elemental combination and corresponding productivity for each product.

|    | Formate Selective |              | CO Selective |              | C <sub>1+</sub> Selective |              | H <sub>2</sub> Selective |              |
|----|-------------------|--------------|--------------|--------------|---------------------------|--------------|--------------------------|--------------|
|    | Alloy             | Productivity | Alloy        | Productivity | Alloy                     | Productivity | Alloy                    | Productivity |
| 1  | In-Sn             | 1.000        | Ag-Ag        | 1.000        | Cu-Pd                     | 1.000        | Mn-Ru                    | 1.000        |
| 2  | Pb-Sn             | 0.996        | Ag-Au        | 0.929        | Mn-Pd                     | 0.784        | Rh-Ru                    | 0.974        |
| 3  | Pb-Zn             | 0.985        | Ag-Sb        | 0.901        | Cr-Pd                     | 0.770        | Mn-Rh                    | 0.970        |
| 4  | Ag-Sn             | 0.982        | Au-Au        | 0.879        | Cu-Ni                     | 0.715        | Co-Ru                    | 0.969        |
| 5  | In-Pb             | 0.971        | Au-Sb        | 0.862        | Au-Pd                     | 0.691        | Co-Mn                    | 0.963        |
| 6  | Sb-Sn             | 0.969        | Au-Ge        | 0.788        | Cu-Pt                     | 0.687        | Ni-Ru                    | 0.959        |
| 7  | Ag-In             | 0.955        | Au-Pb        | 0.688        | Ni-Pd                     | 0.665        | Co-Rh                    | 0.957        |
| 8  | Ga-Sn             | 0.953        | Au-Sn        | 0.679        | Pd-Pd                     | 0.647        | Fe-Ru                    | 0.935        |
| 9  | In-In             | 0.952        | Ag-Pb        | 0.616        | Cu-Cu                     | 0.640        | Co-Ni                    | 0.932        |
| 10 | Sn-Zn             | 0.941        | Au-Zn        | 0.613        | Cr-Pt                     | 0.638        | Co-Co                    | 0.931        |
| 11 | In-Sb             | 0.937        | Au-In        | 0.607        | Pd-Ti                     | 0.629        | Fe-Rh                    | 0.928        |
| 12 | Ge-Pb             | 0.934        | Ag-As        | 0.593        | Mn-Pt                     | 0.628        | Fe-Mn                    | 0.926        |
| 13 | Ag-Ga             | 0.931        | Ni-Se        | 0.535        | Pd-Re                     | 0.624        | Ru-Ru                    | 0.919        |
| 14 | Sb-Zn             | 0.923        | Ag-Sn        | 0.530        | Pd-V                      | 0.623        | Mn-Ni                    | 0.918        |
| 15 | In-Zn             | 0.912        | As-Se        | 0.514        | Pt-Pt                     | 0.618        | Ni-Rh                    | 0.915        |
| 16 | Ag-Zn             | 0.907        | Au-Se        | 0.510        | Cr-Cu                     | 0.615        | Mn-Re                    | 0.906        |
| 17 | Ag-Pb             | 0.905        | Au-Ga        | 0.502        | Ag-Pd                     | 0.602        | Mn-Os                    | 0.899        |
| 18 | Ga-Pb             | 0.903        | Al-Au        | 0.484        | Pt-Si                     | 0.584        | Ir-Mn                    | 0.895        |
| 19 | Ge-In             | 0.903        | Co-Se        | 0.479        | Pd-Rh                     | 0.582        | Co-Ir                    | 0.888        |
| 20 | Pb-Pb             | 0.897        | Ag-Se        | 0.477        | Pt-Ti                     | 0.581        | Co-Fe                    | 0.885        |

**Table S3.** The equation of boundary conditions expressed using binding energy descriptors and the applied potentials.

| Boundary Condition                             | Expression                                                                                                                                                |
|------------------------------------------------|-----------------------------------------------------------------------------------------------------------------------------------------------------------|
| $\Delta G_{rxn}^{(i)} = \Delta G_{rxn}^{(ii)}$ | $0.601 \Delta E_{CO^*} - 0.740 \Delta E_{OH^*} + \Delta E_{H^*} + 1.343 + eU = 0$                                                                         |
| $\Delta G_{rxn}^{(iii)} = 0$                   | $\Delta E_{H^*} + 0.178 + eU = 0$                                                                                                                         |
| $\Delta G_{rxn}^{(iv)} = 0$                    | $\Delta E_{OH^*} - 0.22 - eU = 0$                                                                                                                         |
| $\Delta G_{rxn}^{(v)} = 0.75$                  | $0.563 \Delta E_{CO^*} + 0.857 + eU = 0$ ( $\Delta E_{CO^*} + 0.32 < 0$ )<br>$1.563 \Delta E_{CO^*} + 1.222 + eU = 0$ ( $\Delta E_{CO^*} + 0.32 \geq 0$ ) |
| $\Delta G_{rxn}^{(vi)} = 0$                    | $0.507 \Delta E_{CO^*} + \Delta E_{H^*} + 0.89 = 0$                                                                                                       |
| $\Delta G_{rxn}^{(vii)} = 0$                   | $\Delta E_{H^*} + 0.178 - eU = 0$                                                                                                                         |

**Table S4.** The atomic contents distribution in Cu-Pd electrode prior to and after electrolysis.

| Electroplated Cu-Pd |     | Cu at.% | Pd at.% | Cu : Pd |
|---------------------|-----|---------|---------|---------|
| before electrolysis | XPS | 79.95   | 20.05   | 3.98:1  |
|                     | EDS | 98.76   | 1.24    | 79.64:1 |
| after electrolysis  | XPS | 81.94   | 18.06   | 4.53:1  |
|                     | EDS | 99.00   | 1.00    | 99:1    |

**Table S5.** The Gibbs free energy correction values for gaseous molecules. For all calculations, temperature was set to 298.15 K.

| Species          | Fugacity (Pa) | $E_{zpe}$ (eV) | $\int C_p d$ (eV) | $-TS$ (eV) | $E_{gas}$ (eV) | $G_{corr}$ (eV) |
|------------------|---------------|----------------|-------------------|------------|----------------|-----------------|
| H <sub>2</sub> O | 3,534         | 0.572          | 0.110             | -0.676     | 0.010          | 0.016           |
| H <sub>2</sub>   | 101,325       | 0.269          | 0.090             | -0.402     | -              | -0.043          |
| CO <sub>2</sub>  | 101,325       | 0.304          | 0.098             | -0.662     | 0.460          | 0.200           |
| CO               | 101,325       | 0.130          | 0.090             | -0.610     | 0.070          | -0.320          |
| HCOOH            | 101,325       | 0.885          | 0.124             | -0.830     | 0.270          | 0.449           |

**Table S6.** The Gibbs free energy correction values for adsorbates.

| Species           | $E_{zpe}$ (eV) | $\int C_p d$ (eV) | $-TS$ (eV) | $E_{solv}$ (eV) | $G_{corr}$ (eV) |
|-------------------|----------------|-------------------|------------|-----------------|-----------------|
| H*                | 0.160          | 0.005             | -0.007     | -               | 0.158           |
| CO*               | 0.179          | 0.085             | -0.230     | -0.100          | -0.066          |
| COOH*             | 0.567          | 0.103             | -0.270     | -0.250          | 0.150           |
| HCOO*             | 0.583          | 0.097             | -0.220     | -               | -0.460          |
| COH*              | 0.472          | 0.080             | -0.151     | -0.250          | 0.151           |
| CH*               | 0.368          | 0.025             | -0.038     | -               | 0.347           |
| CH <sub>2</sub> * | 0.651          | 0.042             | -0.069     | -               | 0.624           |



**Table S7.** The hyperparameters of ML regression algorithms determined by Bayesian optimization.

| Model                    | Hyperparameters                                                                                          |
|--------------------------|----------------------------------------------------------------------------------------------------------|
| Gradient Boost Regressor | n_estimators = 4000, learning_rate = 0.15, max_depth = 17, min_samples_leaf = 28, min_samples_split = 24 |

**Table S8.** The atomic contents distribution in Cu-Ga electrode prior to and after electrolysis.

| Electroplated Cu-Ga       |     | Cu at.% | Ga at.% | Cu : Ga |
|---------------------------|-----|---------|---------|---------|
| before electrolysis (XPS) |     | 67.2    | 32.8    | 2.1:1   |
| after electrolysis        | XPS | 84.1    | 15.9    | 5.3:1   |
|                           | EDS | 92.0    | 8.0     | 11.9:1  |

**Table S9.** Structural information, including space group, lattice parameters, occupancy, discrepancy factor ( $R_{wp}$ ), and goodness fit factor ( $\chi^2$ ), derived from the Rietveld refinement of XRD spectra and  $\text{Cu}_{0.85}\text{Ga}_{0.15}$  (ICSD :102892) standards.

| Sample                                               | Space group  | Cell parameter                      | Occupancy              | Cell volume | $R_{wp}$ | $\chi^2$ |
|------------------------------------------------------|--------------|-------------------------------------|------------------------|-------------|----------|----------|
| $\text{Cu}_{0.85}\text{Ga}_{0.15}$<br>(ICSD#10-2892) | <i>Fm-3m</i> | a: 3.6573<br>b: 3.6573<br>c: 3.6573 | Cu: 0.850<br>Ga: 0.150 | 48.919      | -        | -        |
| Pristine<br>Cu-Ga                                    |              | a: 3.6620<br>b: 3.6620<br>c: 3.6620 | Cu: 0.727<br>Ga: 0.273 | 49.108      | 0.021    | 1.293    |
| Spent<br>Cu-Ga                                       |              | a: 3.6515<br>b: 3.6515<br>c: 3.6515 | Cu: 0.876<br>Ga: 0.124 | 48.687      | 0.031    | 2.563    |

### Supplementary References

1. Tang, M. T.; Peng, H.; Lamoureux, P. S.; Bajdich, M.; Abild-Pedersen, F., From electricity to fuels: descriptors for C<sub>1</sub> selectivity in electrochemical CO<sub>2</sub> reduction. *Appl. Catal. B: Environ.* **2020**, *279*, 119384.
2. Liu, X.; Xiao, J.; Peng, H.; Hong, X.; Chan, K.; Nørskov, J. K., Understanding trends in electrochemical carbon dioxide reduction rates. *Nat. Commun.* **2017**, *8* (1), 15438.
3. Ye, C.; Raaijman, S. J.; Chen, X.; Koper, M. T., Enhanced electrochemical CO<sub>2</sub> reduction to formate on poly (4-vinylpyridine)-modified copper and gold electrodes. *ACS Appl. Mater. Interfaces* **2022**, *14* (40), 45263-45271.
4. Buckley, A. K.; Lee, M.; Cheng, T.; Kazantsev, R. V.; Larson, D. M.; Goddard III, W. A.; Toste, F. D.; Toma, F. M., Electrocatalysis at organic–metal interfaces: identification of structure–reactivity relationships for CO<sub>2</sub> reduction at modified Cu surfaces. *J. Am. Chem. Soc.* **2019**, *141* (18), 7355-7364.
